1 **Disparity, Diversity, and Duplications in the Caryophyllales**

2 Stephen A. Smith<sup>\*,1</sup>, Joseph W. Brown<sup>1</sup>, Ya Yang<sup>2</sup>, Riva Bruenn<sup>3,4</sup>, Chloe P. Drummond<sup>3,5</sup>,  
3 Samuel F. Brockington<sup>6</sup>, Joseph F. Walker<sup>1</sup>, Noah Last<sup>2</sup>, Norman A. Douglas<sup>3,7</sup>, Michael J.  
4 Moore<sup>3</sup>

5  
6 <sup>1</sup>Department of Ecology and Evolutionary Biology, University of Michigan, Ann Arbor, 48103

7 <sup>2</sup>Department of Plant Biology, University of Minnesota-Twin Cities, 1445 Gortner Avenue, St.  
8 Paul, MN 55108

9 <sup>3</sup>Department of Biology, Oberlin College, 119 Woodland St., Oberlin, Ohio 44074-1097

10 <sup>4</sup>Current Address: Department of Plant & Microbial Biology, University of California, Berkeley,  
11 Berkeley, California 94720-3102

12 <sup>5</sup>Current Address: Department of Botany, University of Wisconsin-Madison, 430 Lincoln Drive,  
13 Madison, WI 53706

14 <sup>6</sup>Department of Plant Sciences, University of Cambridge, Cambridge CB2 3EA, United  
15 Kingdom

16 <sup>7</sup>Current address: Department of Biology, University of Florida, 618A Carr Hall, Gainesville, FL  
17 32605

18

19 CORRESPONDING AUTHOR: Stephen A. Smith; 734-615-5510; [eebsmith@umich.edu](mailto:eebsmith@umich.edu)

20

21 WORD COUNT

22 Total: 5694

23 Summary: 196

24 Introduction: 1204

25 Materials and Methods: 1683

26 Results and Discussion: 2457

27 This manuscript also contains 3 Main Figures (two in color), 4 Main Tables, and 5

28 Supplementary Figures.

29

30

## 31 **Summary**

- 32 • The role whole genome duplication (WGD) plays in the history of lineages is actively  
33 debated. WGDs have been associated with advantages including superior colonization,  
34 various adaptations, and increased effective population size. However, the lack of a  
35 comprehensive mapping of WGDs within a major plant clade has led to uncertainty  
36 regarding the potential association of WGDs and higher diversification rates.
- 37 • Using seven chloroplast and nuclear ribosomal genes, we constructed a phylogeny of  
38 5,036 species of Caryophyllales, representing nearly half of the extant species. We  
39 phylogenetically mapped putative WGDs as identified from analyses on transcriptomic  
40 and genomic data and analyzed these in conjunction with shifts in climatic niche and  
41 lineage diversification rate.
- 42 • Thirteen putative WGDs and twenty-seven diversification shifts could be mapped onto  
43 the phylogeny. Of these, four WGDs were concurrent with diversification shifts, with  
44 other diversification shifts occurring at more recent nodes than WGDs. Five WGDs were  
45 associated with shifts to colder climatic niches.
- 46 • While we find that many diversification shifts occur after WGDs it is difficult to consider  
47 diversification and duplication to be tightly correlated. Our findings suggest that  
48 duplications may often occur along with shifts in either diversification rate, climatic  
49 niche, or rate of evolution.

50 *Keywords:* Caryophyllales, duplications, climatic niche, diversification rates, phylogenomics

51

## 52 **Introduction**

53 Understanding the causes and correlates of diversification within flowering plants has been a  
54 central goal of evolutionary biologists. Genomic and transcriptomic data have reinvigorated  
55 hypotheses associating whole genome duplication (WGD) with lineage diversification rate  
56 increases (e.g., Levin, 1983; Levin 2002; Barker *et al.* 2009; Estep *et al.*, 2014; Soltis *et al.*,  
57 2014; Edger *et al.* 2015; Puttick *et al.* 2015; Tank *et al.*, 2015; Barker *et al.* 2016; Huang *et al.*  
58 2016; McKain *et al.* 2016; Laurent *et al.* 2017). It is not self-evident why WGDs would be  
59 associated with increases in lineage diversification. One hypothesis suggests that the additional  
60 genetic material provides a basis to generate new adaptations (Edger *et al.*, 2015), although this  
61 itself assumes a co-occurrence of adaptation and lineage proliferation (Levin, 1983). The

62 apparent lack of precise co-occurrence of adaptation and lineage proliferation has been explained  
63 by the potential of a lag model (Schranz *et al.* 2012; Tank *et al.* 2015) where diversification may  
64 follow WGD events. In the absence of overwhelming correlative signal, we are often unable to  
65 discern true ancient WGD events from aneuploidy without advanced genomic information such  
66 as synteny mapping (Dohm *et al.*, 2012). Because it is often difficult to distinguish the two, for  
67 simplicity we will define WGD broadly to include putative ancient WGD events  
68 (paleopolyploidy) and ancient aneuploidy events. WGD events are thought to be a common  
69 occurrence and have been associated with an estimated 15% of angiosperm speciation events  
70 (Wood *et al.*, 2009). However, whether speciation by WGD is correlated with higher  
71 diversification rates remains highly debated (Mayrose *et al.*, 2011; Estep *et al.* 2014; Soltis *et al.*,  
72 2014; Tank *et al.*, 2015; Kellogg *et al.* 2016). Analyses based on recent WGD events have  
73 concluded that immediate extinction rates are higher for polyploid plants (Mayrose *et al.*, 2011;  
74 Arrigo and Barker, 2012). This may result from small initial population sizes and an increased  
75 dependence on selfing. Alternatively, despite the disadvantages of WGD, others have suggested  
76 that polyploids may be superior colonizers (Soltis and Soltis, 2000).

77         Indeed, extreme environments are associated with high levels of WGD, with up to 87%  
78 of species restricted to areas that were glaciated during the last ice age consisting of polyploids  
79 (Brochmann, 2004). However, in the example from Arctic plants, the high level of WGD has  
80 occurred post-glaciation representing a micro-evolutionary period whereas previous studies often  
81 focus at much deeper macro-evolutionary time scales (Mayrose *et al.*, 2011; Tank *et al.*, 2015;  
82 Soltis *et al.*, 2014). From the perspective of a short timescale, polyploidy has the disadvantages  
83 of higher error rates in mitosis (Storchová *et al.*, 2006) and masking of deleterious mutations  
84 allowing them to accumulate to higher frequencies in a population (Otto & Whitton, 2000). A  
85 suite of advantages however may also arise, including gain of asexuality (Miller *et al.* 2000) and  
86 varying effects of heterosis (Comai, 2005). The net role these advantages and disadvantages play  
87 on the macroevolutionary scale is difficult to determine from either the purely short-term or  
88 purely long-term time scales previously used.

89         The long-term consequence of WGD is a central question in macroevolution and  
90 comparative genomics. However, with a suite of advantages and disadvantages, much debate  
91 surrounds the importance and patterns of correlation of WGD (Comai 2005). While  
92 polyploidization events can cause instant speciation, there is no reason to assume that these

93 singular speciation events in themselves would influence large-scale diversification rate shifts  
94 when considering lineage survivorship. Instead, there may be other factors, such as the increase  
95 in genetic material, perhaps increasing genetic diversity or enabling adaptation, that cause long  
96 term shifts in rates of diversification. Adaptations need not be associated with shifts in the tempo  
97 of diversification and those adaptations and shifts in diversification may not co-occur on the  
98 same branch (i.e., there may be a lag time; Donoghue 2005; Smith *et al.*, 2011, Schranz *et al.*,  
99 2012; Donoghue & Sanderson 2015; Tank *et al.*, 2015; Dodsworth *et al.*, 2016). In the broader  
100 context of plant evolution, there are several possible outcomes of WGD in relation to the  
101 evolution and diversification of clades: 1) no relationship between WGD and speciation rate or  
102 habitat shift/adaptation, 2) WGD coincides with an increase of speciation rate, with or without a  
103 lag time, 3) WGD promotes dispersal and habitat shifts, which has mixed relationship with  
104 speciation rate, and 4) a mixture (some association, some not), similar to the previous hypothesis  
105 but without explicitly promoting dispersal or habitat shift or speciation (e.g., adaptation could be  
106 more prominent than dispersal and habitat shift). Here, we contribute to this discussion on  
107 diversification and WGDs with an in-depth examination of the intersection of diversification and  
108 WGDs happening at a range of scales within the hyperdiverse Caryophyllales.

109         The Caryophyllales comprise ~12,500 species in 39 families (Thulin *et al.*, 2016; APG  
110 IV: Chase *et al.*, 2016), representing approximately 6% of extant angiosperm species diversity.  
111 The estimated crown age of Caryophyllales is approximately 67–121 millions of years ago  
112 (mega-annum, Ma) (Bell *et al.*, 2010; Moore *et al.*, 2010). Species of the Caryophyllales exhibit  
113 extreme life-history diversity, ranging from tropical trees to temperate annual herbs, and from  
114 desert succulents (e.g., Cactaceae) to a diverse array of carnivorous plants (e.g., the sundews  
115 *Drosera* and pitcher plants *Nepenthes*). Such extraordinary diversity makes Caryophyllales a  
116 particularly useful system for investigating the relationship between WGD vs. diversification and  
117 niche evolution. Our previous analyses using 62 transcriptomes representing 60 species across  
118 the Caryophyllales identified 13 well-supported ancient WGD events (Yang *et al.*, 2015). We  
119 have since nearly tripled the taxon sampling and assembled a data set comprising high-coverage  
120 transcriptomes and genomes from 169 species across the Caryophyllales (Yang *et al.*,  
121 submitted), providing even greater power for resolving the number and phylogenetic locations of  
122 WGD events. Moreover, the growth in the number of plant taxa on GenBank that are represented  
123 by traditional targeted sequences (e.g., *rbcL*, *matK*, ITS, etc.) and the growth of publicly

124 available collections data (e.g., GBIF, iDigBio) provide excellent opportunities to apply  
125 megaphylogeny and niche diversification approaches at fine scales in Caryophyllales.

126 By examining WGDs and diversification within the Caryophyllales, we present an  
127 important example. Not only does the dataset examined have a high density of transcriptomic  
128 sampling, the diversification of the bulk of Caryophyllales occurred during a time frame  
129 intermediate to that of most published studies that have probed a link between WGD and  
130 macroevolution. This time frame, between 10 and 100 Ma, is important for angiosperms as much  
131 of the diversification that has led to the modern flora occurred during this period and most  
132 modern angiosperm families appeared by this time. Discussion of speciation rate, niche shift, and  
133 WGD would be flawed without accurate mappings of WGD events within this time scale. We  
134 compiled a data set with extensive and precise mapping of WGD combined with a species-level  
135 phylogeny. The megaphylogeny approach has been used extensively in the past to combine data  
136 from many gene regions and across broad taxonomic groups to address evolutionary questions  
137 (Smith *et al.*, 2009). Here, we use this approach to help inform analyses from phylogenomic  
138 studies, and provide a broad context in which to examine these genomic phenomena. With half  
139 of the species sampled, this represents one of the largest and most exhaustive studies of WGDs,  
140 diversification rate, and adaptive shifts.

141

## 142 **Materials and Methods**

143 **Sanger sequencing and assembly.**—A total of 248 new *matK* sequences were included in this  
144 study (Table 1). To generate these sequences, leaf samples were collected in silica in the field or  
145 from cultivated material, or were collected from herbarium sheets. DNA was isolated using  
146 either the Nucleon Phytopure kit (GE Healthcare Life Sciences, Pittsburgh, PA, USA), using the  
147 0.1 g protocol and following manufacturer's instructions, or using the Doyle & Doyle (1987)  
148 protocol, with the addition of 1% PVP-40. An approximately 950 bp region in the middle of the  
149 *matK* gene was amplified and sequenced using custom-designed primers (Table 2). PCRs were  
150 performed in 12.5  $\mu$ L volumes with 0.5  $\mu$ L of 5 mM primer for both primers, 5-20 ng of DNA  
151 template, 0.1  $\mu$ L of GoTaq (Promega, Madison, WI, USA), 6.25  $\mu$ L of Failsafe Premix B  
152 (Epicentre, Madison, WI, USA), and 4.7  $\mu$ L of sterile, deionized water. Reactions were run on a  
153 Bio-Rad PTC 200 thermocycler (Bio-Rad, Hercules, CA, USA) at Oberlin College. Individual  
154 PCRs were cleaned in 16.5  $\mu$ L reactions containing 10 U of Exonuclease I (Affymetrix,

155 ThermoFisher Scientific, Waltham, MA, USA), 2 U of shrimp alkaline phosphatase  
156 (Affymetrix), 8  $\mu$ L of PCR product, and 8.5  $\mu$ L of sterile, deionized water. Sanger sequencing of  
157 the resulting cleaned PCRs was conducted by Neogenomics (formerly SeqWright; Houston, TX,  
158 USA) using an ABI 3730xl automated sequencer (Applied Biosystems, ThermoFisher  
159 Scientific). The resulting forward and reverse sequences for each reaction were trimmed and *de*  
160 *novo* assembled using default parameters of the Geneious assembler in Geneious versions 5-7  
161 (Biomatters, Auckland, New Zealand).

162

163 **Molecular Data for Phylogenetic Reconstruction.**—Nucleotide data from the nuclear  
164 ribosomal internal transcribed spacers (ITS) and *phyC* gene, and the plastid loci *matK*, *ndhF*,  
165 *rbcL*, *trnH-psbA* spacer, and *trnL-trnF* spacer were used to reconstruct the phylogeny. These data  
166 were gathered first using PHLAWD (Smith & Donoghue, 2008; Smith *et al.*, 2009) and then  
167 curated and combined with newly sequenced *matK* data for 124 additional species. This yielded  
168 the following sampling: ITS 2,969 species, *matK* 2,270 species, *ndhF* 417 species, *phyC* 172  
169 species, *rbcL* 947 species, *trnH-psbA* 240 species, and *trnL-trnF* 1,996 species. We used *matK*,  
170 *rbcL*, and *ndhF* sequences from *Aextoxicon*, *Apium*, *Berberidopsis*, *Campanula*, *Clethra*, *Coffea*,  
171 *Echinops*, *Helwingia*, *Ilex*, *Ipomoea*, *Lamium*, *Lonicera*, *Nyssa*, *Polysoma*, *Primula*, *Santalum*,  
172 *Valeriana*, and *Viburnum* to represent outgroups.

173

174 **Phylogenetic Reconstruction.**—We conducted phylogenetic analyses with RAxML v7.2.8  
175 (Stamatakis, 2014) using the full analysis command, -f a, which conducts a rapid bootstrap and  
176 then a full maximum likelihood search. The combined bootstrap and maximum likelihood search  
177 allows for a more thorough maximum likelihood analysis where the initial rapid bootstrap results  
178 prime the maximum likelihood analysis. However, we did not use the rapid bootstrap trees from  
179 this analysis and instead, we conducted a full bootstrap, generating the bootstrap dataset using  
180 phyx (Brown *et al.*, 2017) and then conducting individual maximum likelihood runs on each  
181 constructed bootstrap dataset. This allowed us to conduct SH-like approximate likelihood ratio  
182 test (SH-aLRT; Guindon *et al.*, 2010) on the resulting bootstrap set. We conducted bootstraps  
183 within gene regions and we retained the individual bootstrap alignments to conduct additional  
184 analyses (i.e., bootstrapped alignments contained the same number of gene-specific sites as the  
185 empirical alignment). On each of the resulting trees of the bootstrap and the maximum likelihood

186 tree, we conducted SH-aLRTs as implemented in RAxML. These analyses calculate support for  
187 each edge while also finding the NNI-optimal topology. RAxML completed the likelihood  
188 search for each of these bootstrap replicates, however the SH-aLRT analyses often resulted in an  
189 improved maximum likelihood topology. The trees that resulted from the SH-aLRT, ML, and  
190 bootstrap samples, were used for further analyses. Because several deep relationships within  
191 Caryophyllales are hard to resolve without large amounts of molecular data that are unavailable  
192 for most of the taxa included in this analysis (Yang *et al.*, 2015), for all phylogenetic analyses we  
193 applied the following topological constraint: (Droseraceae, (*Microtea*, (Stegnospermataceae,  
194 Limeaceae, (Lophiocarpaceae, (Barbeuiaceae, Aizoaceae)))))) as per previous analysis  
195 (Brockington *et al.*, 2009; Yang *et al.*, 2015).

196  
197 **Divergence Time Estimation.** — Few tractable options for divergence time estimation exist for  
198 datasets of the size presented here. We use the penalized likelihood approach (Sanderson, 2003)  
199 as implemented in the program treePL (Smith & O’Meara, 2012), which can handle large-scale  
200 phylogenies. The early fossil record of the Caryophyllales is sparse with only a few known  
201 records (Friis *et al.*, 2011; Arakaki *et al.*, 2011): (1) fossil pollen has been ascribed to  
202 Amaranthaceae (*Chenopodipollis*) from the Paleocene of Texas (Nichols & Traverse, 1971); (2)  
203 a putative fossil infructescence from within the Phytolaccaceae in the Campanian has also been  
204 reported (Cevallos-Ferriz *et al.*, 2008), but this phylogenetic position has been disputed (pers.  
205 comm. S. Manchester) and hence we excluded it; (3) Jordan & Macphail (2003) describe a  
206 middle to late Eocene inflorescence from the species *Caryophylloflora paleogenica*, ascribed to  
207 Caryophyllaceae; (4) pollen from Argentina within the Nyctaginaceae has been reported from the  
208 middle Eocene (Zetter *et al.*, 1999); and (5) fossil pollen and seeds of *Aldrovanda* (Degreef,  
209 1997). The penalized likelihood method performs better when a calibration is used at the root.  
210 For this calibration, and because there is no fossil record for the earliest Caryophyllales, we use a  
211 secondary calibration from the comprehensive angiosperm divergence time analyses of Bell *et*  
212 *al.* (2010). We attached several other secondary calibrations to major clades where fossils are not  
213 available (Ocampo & Columbus 2010; Arakaki *et al.*, 2011; Schuster *et al.*, 2013; Valente *et al.*,  
214 2013; see Supp. Table S1 for detail on placement and calibrations). We conducted a priming  
215 analysis to determine the best optimization parameter values. We then performed a cross

216 validation analysis using the random cross validation setting to determine the optimal smoothing  
217 parameter value.

218

219 ***Climate occupancy analyses.***—We downloaded 6,592,700 georeferenced occurrences for the  
220 Caryophyllales from GBIF (accessed on 6/1/2015; <http://gbif.org>). After removing samples  
221 present in living collections, and therefore not necessarily representative of native climates, and  
222 removing samples whose localities were over water, 6,009,552 samples remained. We extracted  
223 bioclimatic values for each coordinate using the 2.5 arc-minute resolution data from WorldClim  
224 (<http://worldclim.org>). We only included taxa that had at least three samples in these analyses to  
225 reduce potential errors and to have the minimum number of samples required to calculate mean  
226 and variance. The resulting overlap of the taxa represented in both the geographic and genetic  
227 data was 2,843 taxa. We conducted principal component analyses (PCA) on these extracted  
228 values. With both the bioclimatic values and the first two axes of the PCA, we conducted  
229 ancestral state reconstruction analyses.

230 We also conducted contrast analyses and calculated Brownian motion rates of evolution  
231 between sister clades (comparing duplicated lineages with their sisters) for mean annual  
232 precipitation, mean annual temperature, and principal component axis 1. We calculated contrasts  
233 using phylogenetic independent contrasts. We calculated Brownian motion rates on sister  
234 lineages independently using the analytical solution for rate:  $\sigma^2 = \frac{1}{n} \sum_{i=1}^n \frac{u_i^2}{v_i^2}$ .

235

236 ***Diversification analyses.***—To map diversification rate shifts, we conducted MEDUSA (Alfaro  
237 *et al.*, 2009; Pennell *et al.*, 2014) analyses on the maximum likelihood tree and the bootstrap  
238 trees. MEDUSA is far more computationally tractable than some other diversification estimation  
239 methods. Furthermore, we required the ability to feasibly integrate over the phylogenetic  
240 uncertainty within the phylogenetic dataset because of both the nature of the larger phylogenetic  
241 dataset and the inherent biological uncertainty within the Caryophyllales. MEDUSA fits a birth-  
242 death model of diversification (with parameters  $r$ : net diversification (birth - death), and  $\epsilon$ :  
243 relative extinction (death / birth)) before using stepwise AIC (Burnham & Anderson, 2002) to  
244 identify shifts in rates of diversification. These complementary analyses accommodate  
245 topological and branch length uncertainty. We employed a birth-death model for 97 chronograms  
246 generated from nonparametric bootstrapping of the original matrix, inferring ML trees in



247 RAxML, and estimating divergence times in treePL using the temporal constraints described  
248 above. We discarded three trees based on poor fossil placement resulting from phylogenetic  
249 uncertainty causing fossil placements to conflict.

250

251 **Whole Genome Duplication Identification.** — To identify WGDs (procedure described below),  
252 we generated a tree based on transcriptomic data. For this tree, we used 178 ingroup data sets  
253 (175 transcriptomes, 3 genomes) representing 169 species in 27 families and 40 outgroup  
254 genomes (Table S1-S2 in Yang et al. submitted). We mapped putative WGD events using  
255 multiple strategies: gene tree topology, plotting synonymous distance, and chromosome counts  
256 (Yang *et al.* 2015; Yang *et al.*, submitted). For gene tree topology analyses, we performed two  
257 alternative strategies for mapping duplication events from gene trees to the species tree: mapping  
258 to the most recent common ancestor (MRCA), or mapping to the species tree only when gene  
259 tree and species tree topologies are compatible.

260 To conduct synonymous distance analyses, we performed the following procedure. For  
261 all ingroup Caryophyllales transcriptome data sets, we calculated the distribution of paralog  
262 synonymous distance following the same procedure as (Yang *et al.*, 2015). We reduced highly  
263 similar peptide sequences with CD-HIT (-c 0.99 -n 5)(Li & Godzik 2006). We also carried out an  
264 all-by-all BLASTP within each taxon using an E value cutoff of 10 and -max\_target\_seq set to  
265 20. Resulting hits with pident < 20% or niden < 50 amino acids were removed. We removed  
266 sequences with ten or more hits to avoid overrepresentation of gene families that experienced  
267 multiple recent duplications. We used the remaining paralog pairs and their corresponding CDS  
268 to calculate Ks values using the pipeline [https://github.com/tanghaibao/bio-](https://github.com/tanghaibao/bio-pipeline/tree/master/synonymous_calculation)  
269 [pipeline/tree/master/synonymous\\_](https://github.com/tanghaibao/bio-pipeline/tree/master/synonymous_calculation) calculation (accessed November 29, 2014). The pipeline first  
270 carries out pairwise protein alignment using default parameters in ClustalW (Larkin *et al.*, 2007),  
271 back-translates the alignment to a codon alignment using PAL2NAL (Suyama *et al.*, 2006), and  
272 calculates the synonymous substitution rate (Ks) using yn00 as part of the PAML package  
273 (Yang, 2007), with Nei–Gojobori correction for multiple substitutions (Nei & Gojobori, 1986).  
274 We obtained chromosome counts from the Chromosome Counts Database (CCDB;  
275 <http://ccdb.tau.ac.il> accessed Oct 5, 2015). When multiple counts were reported from different  
276 authors or different plants, we erred on the conservative estimate and recorded the lowest  
277 number. For species that were not available in the database, we found counts from the literature

278 (e.g., Jepson eFlora <http://ucjeps.berkeley.edu/eflora/> and Flora of North America  
279 <http://floranorthamerica.org>) or by a consensus from species of the same genera.

280

## 281 **Results and Discussion**

282 **Phylogenetic results.** —Phylogenetic analyses showed strong support based on bootstrap and  
283 SH-aLRT values for the monophyly of most Caryophyllales families (see Fig. S1). We found  
284 strong support for the carnivorous clade including Droseraceae, Ancistrocladaceae,  
285 Nepenthaceae, Drosophyllaceae, and Dioncophyllaceae. There was also strong support for this  
286 clade as sister to a clade including Frankeniaceae, Tamaricaceae, Plumbaginaceae, and  
287 Polygonaceae. However, relationships among the families showed more varied support. There  
288 was weak support for the placement of other families relative to other early diverging  
289 Caryophyllales (see Fig. S1). There was strong support for Caryophyllaceae sister to  
290 Amaranthaceae. There was very weak support for Aizoaceae sister to  
291 Phytolaccaceae+Nyctaginaceae. As with previously published analyses, there was no support for  
292 the monophyly of Phytolaccaceae in the traditional sense (i.e., including Phytolaccaceae s.s.,  
293 Petiveriaceae, and *Agdestis*; APG IV) and very weak support for the placement of Sarcobataceae.  
294 There was also weak support for the relationships among Limeaceae, Molluginaceae, and the  
295 Portulacineae. Many of these relationships have been found to be strongly supported but  
296 conflicting in different analyses (Brockington *et al.*, 2009; Soltis *et al.*, 2011; Yang *et al.*, 2015;  
297 Smith *et al.*, 2015; Walker *et al.*, 2017). Here, we focused less on the systematic resolution  
298 within the Caryophyllales and instead examine the potential relationship of diversification and  
299 climate occupancy shifts to WGDs. Therefore, we placed more emphasis on including more taxa  
300 over that of more gene regions (i.e., transcriptomes) at the cost of more missing data. Confident  
301 resolution of many of the systematic relationships will require genomic and transcriptomic  
302 sampling, as well as more thorough taxon sampling (Yang *et al.*, submitted).

303

304 **Climate occupancy reconstruction results.** —We performed climate occupancy ancestral  
305 reconstruction analyses on the phylogeny of 2,843 taxa that included taxa with at least three  
306 sampled geographic coordinates (Figs. 1-3). We conducted these analyses for visualization and  
307 for comparison with diversification and WGD results (see below). Results for individual  
308 bioclimatic variables and principal components can be found in Figs. S2-S4. Bioclimatic variable

309 1 (mean annual temperature, Fig. 1) showed that there are several strong phylogenetic patterns of  
310 clades with preferences for colder or warmer regions. For example, Polygonaceae,  
311 Caryophyllaceae, and Montiaceae each are dominated by taxa with preferences for cold  
312 environments, although each also contains early-diverging taxa with preferences to warm  
313 environments. In contrast, taxa inhabiting warm environments predominate in Cactaceae,  
314 Amaranthaceae, Aizoaceae, the carnivorous clade (Droseraceae, Drosophyllaceae,  
315 Nepenthaceae, Ancistrocladaceae, Dioncophyllaceae), and the phytolaccoid clade  
316 (Nyctaginaceae, Phytolaccaceae, Petiveriaceae, Sarcobataceae, and *Agdestis*). Bioclimatic  
317 variable 12 (mean annual precipitation) showed a relatively consistent pattern of relatively dry to  
318 intermediately wet clades throughout the group. Indeed, only a few clades inhabiting wet  
319 ecosystems (in this case, the wet tropics) exist in the Caryophyllales, specifically small groups  
320 within the carnivorous clade, the phytolaccoids, early-diverging Polygonaceae, and other small  
321 groups throughout the Caryophyllales. The principal component loadings are presented in Fig. 2  
322 and Fig. S5. Principal component 1, PCA1, showed significant differentiation throughout the  
323 Caryophyllales, as for example, early-diverging Polygonaceae vs the rest of Polygonaceae, early  
324 diverging Caryophyllaceae vs the rest of Caryophyllaceae, phytolaccoids vs Aizoaceae, and  
325 Portulacineae + relatives vs Cactaceae, to mention a few. These results generally reflect the  
326 extensive ecological diversification throughout the group. They also reflect significant  
327 diversification in the temperate regions of the world especially within the Caryophyllaceae and  
328 Polygonaceae contrasted with extensive diversification in the succulent lineages (especially  
329 Aizoaceae and Cactaceae) found in relatively dry and warm environments.

330

331 **Diversification.** —Significant shifts in diversification were detected in most major clades (Table  
332 4, Fig. 1). The results from diversification analyses on the maximum likelihood tree and  
333 bootstrap tree set were generally congruent with each other. However, there were discrepancies  
334 (Fig. 1). The bootstrap set recovered many shifts in Polygonaceae, the carnivorous clade,  
335 Caryophyllaceae, some shifts within Cactaceae, phytolaccoids, and Amaranthaceae.  
336 Disagreements on the existence and placement of shifts are primarily within Portulacineae,  
337 Aizoaceae, and Amaranthaceae. Overall, MEDUSA detected 27 increases in diversification rate  
338 using the ML tree and 16 increases using the bootstrap trees. Given the relative lack of support of  
339 some of the branches in the phylogeny, we find the MEDUSA results on the set of bootstrapped

340 trees to be the most conservative while the ML results are suggestive but not definitive of  
341 diversification shifts.

342

343 **Duplications, diversification, and climate occupancy.** —WGD analyses showed thirteen  
344 putative WGDs that can be mapped to clades (i.e., involve more than 1 taxon in the dataset;  
345 Table 3 and Figs. 1-3). Many of these were found in early diverging lineages as opposed to  
346 nested deep within families, though there are WGDs identified in *Amaranthus* and *Claytonia*.  
347 We also found evidence of nested WGDs as within the phytolaccoids and Portulacineae. In  
348 addition to these deeper WGDs, there were several more recent WGDs that were present in Ks  
349 plots but could not be mapped to a clade (Yang *et al.*, submitted). By sampling more extensively,  
350 Yang *et al.* (submitted) and Walker *et al.* (2017) found additional WGD events within the  
351 Caryophyllales. We will surely find additional WGDs events in other lineages as more effort is  
352 placed on denser taxon sampling using genomes and transcriptomes. We did not explore WGDs  
353 that could only be mapped to terminal branches as we could not verify these phylogenetically.  
354 Further discussion of specific results related to the WGDs themselves can be found in Yang *et al.*  
355 (submitted) and Walker *et al.* (2017).

356 To better examine whether WGDs coincide with diversification rate shifts, increases and  
357 decreases, or notable changes in climate tolerance, we mapped WGDs onto the large phylogenies  
358 and summarized the number of species and climate occupancy information for each clade  
359 (Tables 3-4, Figs. 1-3). Some WGD events were associated with synchronous diversification  
360 events. For example, within Nyctaginaceae, a WGD event occurs on the same branch (leading to  
361 Tribe Nyctagineae; Douglas & Spellenberg, 2010) as an increase in diversification rate in both  
362 the ML tree and the bootstrapped dataset (Fig. 1, dup:1 div:n). These events were also associated  
363 with a shift in life history and niche from an ancestral woody habit in the tropics to the largely  
364 herbaceous, arid-adapted temperate Nyctagineae. This was also the case for *Amaranthus* (Fig. 1,  
365 dup:5 div:x). Other coincident diversification and WGD events in the Droseraceae and  
366 Nepenthaceae were only supported by the ML tree. Although these correlated events may, in  
367 fact, be accurate, we will reserve more comments for when these are more confidently resolved.  
368 Other than these simultaneous shifts and one diversification shift at the base of the MRCA of  
369 Nyctaginaceae+Cactaceae, all other shifts in diversification occurred more recently than WGD  
370 events. Several authors have suggested that this lagging pattern may be common at the broader

371 angiosperm scale (Schranz *et al.* 2015, Tank *et al.* 2015), though the expected distance of the  
372 diversification shift from the WGD event was not specified (this is discussed more below). In the  
373 results presented here, some diversification events occur shortly after the WGD event, such as  
374 within the Amaranthaceae (dup: 6) and Portulacineae (dup: 4). For others, it is difficult to  
375 determine whether the diversification events that occur after the WGD events are significantly  
376 close to the WGD to warrant suggestion of an association (e.g., dup: 7, dup: 10, dup: 8). More  
377 description of a model that would generate a null expectation would be necessary to determine  
378 what is “close enough” (see discussion below).

379 Many of the other inferred lineage diversification rate shifts are associated with very  
380 recent, rapid radiations within genera such as those documented within *Commicarpus*  
381 (Nyctaginaceae), *Dianthus* (Caryophyllaceae), *Cerastium* (Caryophyllaceae), *Arenaria*  
382 (Caryophyllaceae), and *Salicornia* (Amaranthaceae), to name a few (Table 4). Although  
383 polyploids were reported in these clades, we were unable to pinpoint the phylogenetic location of  
384 any WGD with our current taxon sampling (e.g., *Dianthus*; Carolin, 1954; Weiss *et al.* 2002).  
385 Increased sampling of transcriptomes and genomes will shed more light in these areas. While we  
386 only find a few WGDs that coincide well with diversification rate shifts, it is important to note  
387 that the uncertainty in the phylogenies makes it difficult to map anything but the strongest  
388 diversification signals. This discrepancy can be seen in the difference between the number of  
389 events supported by the ML analyses and those supported by the bootstrap analyses. It is possible  
390 that additional sequence data will improve phylogenetic resolution and confidence, and that  
391 consequently additional diversification events will emerge.

392 Equally interesting to the few WGD events associated directly with diversification are the  
393 WGD events associated with general shifts in climate tolerance. WGDs in the Polygonaceae,  
394 Caryophyllaceae, Montiaceae, and the Tribe Nyctagineae appear to be associated with movement  
395 into colder environments (Figs. 1-2 and Figs. S2-S3). Species arising after the WGD within the  
396 Amaranthaceae occupy wetter environments than the sister clade. The WGDs within the  
397 carnivorous plants were also associated with shifts in environment as Nepenthaceae are found in  
398 very wet environments and the Droseraceae are found in somewhat drier environments, at least  
399 comparatively. However, in these cases, perhaps the development of the wide array of  
400 morphologies associated with carnivory, apart from *Drosophyllum*, is more obviously associated  
401 with the WGD (Walker *et al.*, 2017).

402           While these qualitative assessments suggest potential correlations of shift in the climate  
403 occupied and WGDs, more specific and direct comparisons are necessary to quantify the extent  
404 of the shifts. For many of the clades experiencing WGD, a direct comparison with a sister clade  
405 is difficult because the sister may consist of a single species, another clade with WGD, or  
406 another complication. For example, there are WGDs at the base of both Polygonaceae and  
407 Plumbaginaceae as well as Nepenthaceae and Droseraceae. However, we made direct  
408 comparison of five duplicated lineages (see Fig. 3) in both means (i.e., character contrasts  
409 between sister clades) and variances (rate of Brownian motion) of climatic variables. In each  
410 case, the duplicated lineage occupied a colder mean annual temperature. This was also the case  
411 with the nested WGDs of Portulacineae and the Tribe Nyctagineae. Of course, we are not  
412 suggesting that all WGDs are associated with a shift to a colder climate. While such a pattern  
413 may exist in some groups such as Caryophyllaceae, we emphasize the observation that there is a  
414 shift in the climate occupied rather than the direction of the shift. Mean annual precipitation is  
415 not as clear with some clades occupying a higher precipitation and some occupying lower  
416 precipitation. Perhaps the best summary of climatic niche is the principal components of all the  
417 climatic variables. Here, while the shift in units is less easily interpreted, duplicated clades  
418 occupied different niches than sister lineages. This supports the hypothesis that WGD events are  
419 associated with adaptations. Here, many of these adaptations are associated with shifts in  
420 climatic niches. This necessitates further examination in other angiosperm clades to investigate  
421 how general these results are.

422           The rates of niche evolution show more complicated patterns. While some clades, such as  
423 the Portulacineae, showed significant increase in a rate of niche evolution as compared to the  
424 sister clade (e.g., MAT), no clear pattern emerged across all comparisons. There were other  
425 shifts in rate such as with MAT and MAP in the Nyctagineae and Montiaceae, but these were  
426 not as strong as the pattern of climate occupancy itself discussed above.

427           With each of these patterns presented here, it is important to consider them in the context  
428 of uncertainty, both inherent in the biological processes that generate the phylogeny and in the  
429 analyses associated with large scale datasets. These large phylogenies and datasets allow for  
430 more thorough examination of the clades, but uncertainty makes precise mapping of weaker  
431 signals difficult. As mentioned above, both the mapping of diversification events and  
432 duplications demonstrate this. Furthermore, the comparisons of the sister clades for climatic

433 niche analyses assumes accurate identification of sister lineages. Increasing taxon sampling may  
434 help, but additional sequence data and specimen data for phylogenetic analyses, WGD mapping  
435 analyses, and climate niche characterization will surely improve our precision in these  
436 investigations.

437         What emerges from these analyses of WGD, diversification, and climate occupancy? It  
438 would appear as though, perhaps not unexpectedly, the patterns are complex and mixed. Some  
439 WGD are associated directly with diversification events, some WGD are associated with shifts in  
440 climate tolerance, some WGD are coincident with shifts in rates of niche evolution, and still  
441 other WGD are associated with known adaptations (carnivory, habit shifts associated with  
442 montane habitats, etc.). Some diversification shifts follow WGD events. However, it is unclear  
443 whether these events are linked or correlated and, if so, if they are correlated more with  
444 diversification than an additional adaptation or other evolutionary pattern or process. As data  
445 increase in these groups and as confidence increases in the phylogenetic relationships as well as  
446 the placement of both diversification and WGD events, we will be able to better address these  
447 questions. However, at least for the Caryophyllales, it does not appear as though diversification  
448 is tightly linked with WGD. Instead, for the clades that can be tested, we find shifts in climate  
449 occupancy correspond well to WGD.

450  
451 **Suggestions for moving forward.** —WGD are almost certainly one of the dominant processes  
452 that contribute to major evolutionary events within plant lineages. This may be in the form of  
453 increased diversification, development of novel traits, adaptation to new environments, and many  
454 other events (e.g., Schubert and Vu, 2016; Clavijo *et al.* 2017). However, for several reasons,  
455 these events (i.e., WGD and other evolutionary events) may not occur simultaneously. In fact,  
456 there may be little to no expectation for the events to occur simultaneously (e.g., Donoghue,  
457 2005; Schranz *et al.* 2012; Donoghue & Sanderson, 2015; Tank *et al.*, 2015; Dodsworth *et al.*  
458 2016). In any case, more precise expectations and null models need to be developed to allow for  
459 reasonable tests of the correlations among these events. For example, there may be shifts in  
460 diversification that follow a WGD, but is it close enough, or frequent enough to infer that the two  
461 events are related? Is correlation possible or identifiable if, as is expected, intervening lineages  
462 have gone extinct? These questions would benefit from simulation studies where the true  
463 correlation pattern is known. Furthermore, more precise connections should be made to the

464 biology of speciation and genome WGDs to better determine why, specifically, WGDs would be  
465 expected to correspond with any diversification pattern instead of adaptations, which may or may  
466 not correspond with increases or decreases in speciation. While still challenging, investigating  
467 the fate of and patterns of selection within individual genes (e.g., subfunctionalization and  
468 neofunctionalization) may shed light into the genomic basis of post-WGD and possibly allow for  
469 more concrete expectations for diversification. With the availability of genomes and  
470 transcriptomes, this is now beginning to become a possibility (e.g., Brockington *et al.*, 2015,  
471 Walker *et al.*, 2017). Only when these suggestions are linked to more specific biological  
472 hypotheses will we be able to better understand the ultimate impact of WGD in plant evolution.

473

#### 474 **Acknowledgements**

475 We thank Caroline Parins-Fukuchi for discussion of the project and comments on the  
476 manuscript. We thank Gregory Stull, Oscar Vargas, Ning Wang, Sonia Ahluwalia, Jordan Shore,  
477 Lijun Zhao, Alex Taylorm, and Drew Larson for helpful comments on the manuscript. The  
478 authors thank Hilda Flores, Helga Ochoterena, Tom Wendt and the staff at the Plant Resources  
479 Center at the University of Texas at Austin, the Lyon Arboretum, David Anderson, John  
480 Brittnacher, Anna Brunner, Joseph Charboneau, Arianna Goodman, Heather-Rose Kates, Patricia  
481 Hernández Ledesma, Lucas Majure, Nidia Mendoza, Michael Powell, Rick Ree, Carl Rothfels,  
482 Flora Samis, Jeffrey Sanders, Elizabeth Saunders, Rich Spellenberg, Greg Stull, Mats Thulin,  
483 Erin Tripp, and Sophia Weinmann for help with obtaining material. We thank the Cambridge  
484 University Botanic Gardens for growing material for this study. This work was supported by  
485 NSF DEB awards 1352907 and 1354048.

486

#### 487 **Author contributions**

488 S.A.S., J.F.W., Y.Y., M.J.M., and S.F.B. designed research. C.P.D, R. B., N.L., and N.A.D.  
489 collected data. S.A.S., J.W.B., and Y.Y. analyzed the data. S.A.S. led the writing. All authors  
490 read and contributed to the manuscript.

491

#### 492 **References**

493 **Alfaro ME, Santini F, Brock C, Alamillo H, Dornburg A, Rabosky DL, Carnevale G,**  
494 **Harmon LJ. 2009.** Nine exceptional radiations plus high turnover explain species



- 495 diversity in jawed vertebrates. *Proceedings of the National Academy of Sciences, USA*  
496 **106**: 13410–13414.
- 497 **Angiosperm Phylogeny Group**. 2016. An update of the Angiosperm Phylogeny Group  
498 classification for the orders and families of flowering plants: APG IV. *Botanical Journal*  
499 *of the Linnean Society* 181: 1-20.
- 500 **Arakaki M, Christin PA, Nyffeler R, Lendel A, Eggli U, Ogburn RM, Spriggs E, Moore**  
501 **MJ, Edwards EJ. 2011.** Contemporaneous and recent radiations of the world's major  
502 succulent plant lineages. *Proceedings of the National Academy of Sciences, USA* **108**:  
503 8379–8384.
- 504 **Arrigo N, Barker MS. 2012.** Rarely successful polyploids and their legacy in plants genomes.  
505 *Current Opinion in Plant Biology* **15**: 140–146.
- 506 **Barker MS, Vogel H, Schranz ME. 2009.** Paleopolyploidy in the Brassicales: Analyses of  
507 the *Cleome* transcriptome elucidate the history of genome duplications in *Arabidopsis*  
508 and other Brassicales. *Genome Biology and Evolution* **1**: 391–399.
- 509 **Barker MS, Husband BC, Pires JC. 2016.** Spreading Winge and flying high: The evolutionary  
510 importance of polyploidy after a century of study. *Am. J. Bot.* **103**: 1139-1145.
- 511 **Bell CD, Soltis DE, Soltis PS. 2010.** The age and diversification of the angiosperms re-revisited.  
512 *American Journal of Botany* **97**: 1296–1303.
- 513 **Brochmann C, Brysting AK, Alsos IG, Borgen L, Grundt HH, Scheen AC, Elven R. 2004.**  
514 Polyploidy in arctic plants. *Biological Journal of the Linnean Society* **82**: 521–536.
- 515 **Brockington SF, Alexandre R, Ramdial J, Moore MJ, Crawley S, Dhingra A, Hilu K, Soltis**  
516 **DE, Soltis PS. 2009.** Phylogeny of the Caryophyllales *sensu lato*: revisiting hypotheses  
517 on pollination biology and perianth differentiation in the core Caryophyllales.  
518 *International Journal of Plant Sciences* **170**: 627–643.
- 519 **Brockington SF, Yang Y, Gandia-Herrero F, Covshoff S, Hibberd JM, Sage RF, Wong GK,**  
520 **Moore MJ, Smith SA. 2015.** Lineage-specific gene radiations underlie the evolution of  
521 novel betalain pigmentation in Caryophyllales. *New Phytologist* **207**: 1170–1180.
- 522 **Brown JW, Walker JF, Smith SA. 2017.** phyx: Phylogenetic tools for Unix. *Bioinformatics*  
523 **btx063**.
- 524 **Burnham KP, Anderson DR. 2003.** Model Selection and Multimodel Inference: A Practical  
525 Information-Theoretic Approach. Springer, New York.

- 526 **Carolin RC. 1954.** Stomatal size, density and morphology in the genus *Dianthus*. *Kew Bulletin*  
527 **9:** 251-258.
- 528 **Cevallos-Ferriz SRS, Estrada-Ruiz E, Perez-Hernandez BR. 2008.** Phytolaccaceae  
529 infructescence from Cerro del Pueblo formation, upper Cretaceous (late Campanian),  
530 Coahuila, Mexico. *American Journal of Botany* **95:** 77–83.
- 531 **Chase MW, Christenhusz MJM, Fay MF, Byng JW, Judd WS, Soltis DE, Mabberley DJ,**  
532 **Sennikov AN, Soltis PS, Stevens PF. 2016.** An update of the Angiosperm Phylogeny  
533 Group classification for the orders and families of flowering plants: APG IV. *Botanical*  
534 *Journal Linnean Society* **181:** 1-20.
- 535 **Clavijo BJ, Venturini L, Schudoma C, Accinelli GG, Kaithakottil G, Wright J, Borrill P,**  
536 **Kettleborough G, Heavens D, Chapman H, Lipscombe J, Barker T, Lu FH,**  
537 **McKenzie N, Raats D, Ramirez-Gonzalez RH, Coince A, Peel N, Percival-Alwyn L,**  
538 **Duncan O, Trösch J, Yu G, Bolser DM, Namaati G, Kerhornou A, Spannagl M,**  
539 **Gundlach H, Haberer G, Davey RP, Fosker C, Palma FD, Phillips A, Millar AH,**  
540 **Kersey PJ, Uauy C, Krasileva KV, Swarbreck D, Bevan MW, Clark MD. 2017.** An  
541 improved assembly and annotation of the allohexaploid wheat genome identifies  
542 complete families of agronomic genes and provides genomic evidence for chromosomal  
543 translocations. *Genome Research* doi: 10.1101/gr.217117.116
- 544 **Comai L. 2005.** The advantages and disadvantages of being polyploid. *Nature Review Genetics*  
545 **6:** 836–846.
- 546 **Degreef JD. 1997.** Fossil *Aldrovanda*. *Carnivorous Plant Newsletter* **26:** 93–97. Available at:  
547 [http://www.carnivorousplants.org/cpn/articles/CPNv26n3p93\\_97.pdf](http://www.carnivorousplants.org/cpn/articles/CPNv26n3p93_97.pdf)  
548 [http://www.carnivorousplants.org/cpn/articles/CPNv26n3p93\\_97.pdf](http://www.carnivorousplants.org/cpn/articles/CPNv26n3p93_97.pdf)
- 549 **Dodsworth S, Chase M, Leitch A. 2016.** Is post-polyploidization diploidization the key to the  
550 evolutionary success of angiosperms. *Botanical Journal of the Linnean Society* **180:**  
551 1095–8339.
- 552 **Dohm JC, Lange C, Holtgräwe D, Sörensen TR, Borchardt D, Schulz B, Lehrach H,**  
553 **Weisshaar B, Himmelbauer H. 2012.** Palaeohexaploid ancestry for Caryophyllales  
554 inferred from extensive gene-based physical and genetic mapping of the sugar beet  
555 genome (*Beta vulgaris*). *The Plant Journal* **70:** 528–40.

- 556 **Donoghue MJ. 2005.** Key innovations, convergence, and success: macroevolutionary lessons  
557 from plant phylogeny. *Paleobiology* **31**:77-93.
- 558 **Donoghue MJ, Sanderson MJ. 2015.** Confluence, synnovation, and depauperons in plant  
559 diversification. *New Phyt.* **207**:260-274.
- 560 **Douglas N, Spellenberg R. 2010.** A new tribal classification of Nyctaginaceae. *Taxon* **59**: 905–  
561 910.
- 562 **Doyle JJ, Doyle JL. 1987.** A rapid DNA isolation procedure for small quantities of fresh leaf  
563 tissue. *Phytochemical Bulletin* **19**: 11-15.
- 564 **Edger PP, Heidel-Fischer HM, Bekaert M, Rota J, Glöckner G, Platts AE, Heckel DG, Der  
565 JP, Wafula EK, Tang M, Hofberger JA. 2015.** The butterfly plant arms-race escalated  
566 by gene and genome duplications. *Proceedings of the National Academy of Sciences,*  
567 *USA* **112**: 8362–8366.
- 568 **Estep MC, McKain MR, Vela Diaz D, Zhong J, Hodge JG, Hodkinson TR, Layton DJ,  
569 Malcomber ST, Pasquet R, Kellogg EA. 2014.** Allopolyploidy, diversification, and the  
570 Miocene grassland expansion. *Proceedings of the National Academy of Sciences of the*  
571 *United States of America* **111**: 15149–15154.
- 572 **Friis EM, Crane P, Pedersen KR. 2011.** Early Flowers and Angiosperm Evolution. Cambridge.
- 573 **Guindon S, Dufayard J, Lefort V, Anisimova M, Hordijk W, Gascuel O. 2010.** New  
574 algorithms and methods to estimate maximum-likelihood phylogenies: assessing the  
575 performance of PhyML 3.0. *Systematic Biology* **59**: 307–321.
- 576 **Huang, CH, Zhang C, Liu M, Hu Y, Gao T, Qi J, Hong Ma. 2016.** Multiple Polyploidization  
577 Events across Asteraceae with Two Nested Events in the Early History Revealed by  
578 Nuclear Phylogenomics. *Mol Biol Evol.* **33**: 2820-2835.
- 579 **Jordan GJ, Macphail MK. 2003.** A middle-late Eocene inflorescence of Caryophyllaceae from  
580 Tasmania, Australia. *American Journal of Botany* **90**: 761–768.
- 581 **Kellogg EA. 2016.** Has the connection between polyploidy and diversification actually been  
582 tested? *Current opinion in plant biology* **30**: 25–32.
- 583 **Laurent S, Salamin N, Robinson-Rechavi M. 2017.** No evidence for the radiation time lag  
584 model after whole genome duplications in Teleostei. (A von Haeseler, Ed.). *PloS one* **12**:  
585 e0176384.
- 586 **Levin DA. 1983.** Polyploidy and novelty in flowering plants. *American Naturalist* **122**: 1–25.

- 587 **Levin DA. 2002.** The Role of Chromosomal Change in Plant Evolution. Oxford University  
588 Press: New York.
- 589 **Li, Weizhong, and Adam Godzik. 2006.** Cd-Hit : A Fast Program for Clustering and  
590 Comparing Large Sets of Protein or Nucleotide Sequences. *Bioinformatics Applications*  
591 *Note* 22 (13): 1658–59. doi:10.1093/bioinformatics/btl158.
- 592 **McKain MR, Tang H, McNeal JR, Ayyampalayam S, Davis JI, dePamphilis CW, Givnish**  
593 **TJ, Pires JC, Stevenson DW, Leebens-Mack JH. 2016.** A Phylogenomic Assessment  
594 of Ancient Polyploidy and Genome Evolution across the Poales. *Genome Biol. Evol.* **8**:  
595 1150-1164.
- 596 **Mayrose I, Zhan SH, Rothfels CJ, Magnuson-Ford K, Barker MS, Rieseberg LH, Otto SP.**  
597 **2011.** Recently formed polyploid plants diversify at lower rates. *Science* **333**: 1257.
- 598 **Miller JS, Venable DL. 2000.** Polyploidy and the evolution of gender dimorphism in plants.  
599 *Science* **289**: 2335–2338.
- 600 **Moore MJ, Soltis PS, Bell CD, Burleigh JG, Soltis DE. 2010.** Phylogenetic analysis of 83  
601 plastid genes further resolves the early diversification of eudicots. *Proceedings of the*  
602 *National Academy of Sciences, USA* **107**: 4623–4628.
- 603 **Nei M, Gojobori T. 1986.** Simple methods for estimating the numbers of synonymous and  
604 nonsynonymous nucleotide substitutions. *Molecular Biology and Evolution* **3**: 418–426.
- 605 **Nichols DJ, Traverse A. 1971.** Palynology, petrology, and depositional environments of some  
606 early Tertiary lignites in Texas. *Geoscience and Man* **3**: 37–48.
- 607 **Ocampo G, Columbus T. 2010.** Molecular phylogenetics of suborder Cactineae  
608 (Caryophyllales), including insights into photosynthetic diversification and historical  
609 biogeography. *Am. J. Bot.* **97**: 1827-1847.
- 610 **Otto SP, Whitton J. 2000.** Polyploid incidence and evolution. *Annual Review of Genetics* **34**:  
611 401–437.
- 612 **Pennell MW, Eastman JM, Slater GJ, Brown JW, Uyeda JC, Fitzjohn RG, Alfaro ME,**  
613 **Harmon LJ. 2014.** geiger v2.0: an expanded suite of methods for fitting  
614 macroevolutionary models to phylogenetic trees. *Bioinformatics* **30**: 2216–2218.
- 615 **Puttick MN, Clark J., Donoghue P. 2015.** Size is not everything: rates of genome size  
616 evolution, not C-value, correlate with speciation in angiosperms. *Proc. Roy. Soc. B.* **282**:  
617 20152289.

- 618 **Sanderson MJ.** 2003. r8s: inferring absolute rates of molecular evolution and divergence times  
619 in the absence of a molecular clock. *Bioinformatics* 19: 301–302.
- 620 **Schranz E, Mohammadin S, Edger PP.** 2012. Ancient whole genome duplications, novelty and  
621 diversification: the WGD Radiation Lag-Time Model. *Current opinion in plant biology*  
622 15: 147–153.
- 623 **Schubert I, Vu GTH.** 2016. Genome Stability and Evolution: Attempting a Holistic View.  
624 *Trends in Plant Sciences* 21: 749-757.
- 625 **Schuster TM, Setaro SD, Kron KA.** 2013. Age Estimates for the Buckwheat Family  
626 Polygonaceae Based on Sequence Data Calibrated by Fossils and with a Focus on the  
627 Amphi-Pacific *Muehlenbeckia*. *Plos ONE* 8(4): e61261.
- 628 **Smith SA, Beaulieu JM, Donoghue MJ.** 2009. Mega-phylogeny approach for comparative  
629 biology: an alternative to supertree and supermatrix approaches. *BMC Evolutionary*  
630 *Biology* 9: 37.
- 631 **Smith SA, Beaulieu JM, Stamatakis A, Donoghue MJ.** Understanding angiosperm  
632 diversification using small and large phylogenetic trees. *American Journal of Botany* 98:  
633 404–414.
- 634 **Smith SA, Donoghue MJ.** 2008. Rates of molecular evolution are linked to life history in  
635 flowering plants. *Science* 322: 86–89.
- 636 **Smith SA, O’Meara BC.** 2012. treePL: divergence time estimation using penalized likelihood  
637 for large phylogenies. *Bioinformatics* 28: 2689–2690.
- 638 **Smith SA, Moore MJ, Brown JW, Yang Y.** 2015. Analysis of phylogenomic datasets reveals  
639 conflict, concordance, and gene duplications with examples from animals and plants.  
640 *BMC Evolutionary Biology* 15: 150.
- 641 **Soltis PS, Soltis DS.** 2000. The role of genetic and genomic attributes in the success of  
642 polyploids. *Proceedings of the National Academy of Sciences, USA* 97: 7051–7057.
- 643 **Soltis DE, Smith SA, Cellinese N, Wurdack KJ, Tank DC, Brockington SF, Refulio-**  
644 **Rodriguez NF, Walker JB, Moore MJ, Carlsward BS, Bell CD.** 2011. Angiosperm  
645 phylogeny: 17 genes, 640 taxa. *American Journal of Botany* 98: 704–730.
- 646 **Soltis PS, Liu X, Marchant DB, Visger CJ, Soltis DE.** 2014. Polyploidy and novelty:  
647 Gottlieb’s legacy. *Philosophical Transactions of the Royal Society of London B:*  
648 *Biological Sciences* 369: 20130351.

- 649 **Stamatakis A.** 2014. RAxML version 8: a tool for phylogenetic analysis and post-analysis of  
650 large phylogenies. *Bioinformatics* 30: 1312–1313.
- 651 **Storchová Z, Breneman A, Cande J, Dunn J, Burbank K, O'toole E, Pellman D.** 2006.  
652 Genome-wide genetic analysis of polyploidy in yeast. *Nature* 443: 541.
- 653 **Suyama M, Torrents D, Bork P.** 2006. PAL2NAL: robust conversion of protein sequence  
654 alignments into the corresponding codon alignments. *Nucleic Acids Research* 34 (suppl  
655 2): W609–W612.
- 656 **Tank DC, Eastman JM, Pennell MW, Soltis PS, Soltis DE, Hinchliff CE, Brown JW, Sessa  
657 EB, Harmon LJ.** 2015. Nested radiations and the pulse of angiosperm diversification:  
658 increased diversification rates often follow whole genome duplications. *New Phytologist*  
659 207: 454–467.
- 660 **Thulin M, Moore AJ, El-Seedi H, Larsson A, Christin P-A, Edwards EJ.** 2016. Phylogeny  
661 and generic delimitation in Molluginaceae, new pigment data in Caryophyllales, and the  
662 new family Corbichoniaceae. *Taxon* 65: 775–793.
- 663 **Valente LM, Britton AW, Powell MP, Papadopoulos AST, Burgoyne PM, Savolainen V.**  
664 2014. Correlates of hyperdiversity in southern African ice plants (Aizoaceae). *Botanical  
665 Journal of the Linnean Society Linnean Society of London.* 174:110-129.
- 666 **Walker JF, Yang Y, Moore MJ, Mikenas J, Timoneda A, Brockington SF, Smith SA.** 2017.  
667 Widespread paleopolyploidy, gene tree conflict, and recalcitrant relationships among the  
668 carnivorous Caryophyllales. *bioRxiv*: 115741.
- 669 **Weiss H, Dobes C, Schneeweiss GM, Greimler J.** 2002. Occurrence of tetraploid and  
670 hexaploid cytotypes between and within populations in *Dianthus* sect. *Plumaria*  
671 (Caryophyllaceae). *New Phyto.* 156: 85-94.
- 672 **Wood TE, Takebayashi N, Barker MS, Mayrose I, Greenspoon PB, Rieseberg LH.** 2009.  
673 The frequency of polyploid speciation in vascular plants. *Proceedings of the National  
674 Academy of Sciences, USA* 106: 13875–13879.
- 675 **Yang Y, Moore MJ, Brockington SF, Soltis DE, Wong GK-S, Carpenter EJ, Zhang Y,  
676 Chen L, Yan Z, Xie Y, Sage RF.** 2015. Dissecting molecular evolution in the highly  
677 diverse plant clade Caryophyllales using transcriptome sequencing. *Molecular Biology  
678 and Evolution* 32: 2001–2014.

679 **Yang Y, Moore M, Brockington S, Mikenas J, Olivieri J, Walker J, Smith S. submitted.**

680 Improved Transcriptome Sampling Pinpoints 26 Paleopolyploidy Events In

681 Caryophyllales, Including Two Paleo-Allopolyploidy Events. *bioRxiv*: 143529.

682 **Yang Z. 2007.** PAML 4: phylogenetic analysis by maximum likelihood. *Molecular Biology and*

683 *Evolution* **24**: 1586–1591.

684 **Zetter R, Hofmann CC, Draxler I, Durango de Cabrera J, Del MVergel M, Vervoorst F.**

685 **1999.** A rich middle Eocene microflora at Arroyo de los Mineros, near Cañadón Beta, NE

686 Tierra del Fuego province, Argentina. *Abhandlungen der Geologischen Bundesanstalt*

687 56: 439–460.

688

689 **Tables**

690 **Table 1** Voucher information and GenBank accession numbers for newly reported plastid *matK*  
 691 sequences. Families follow APG IV (Angiosperm Phylogeny Group, 2016).

| Family          | Taxon                                                                     | Voucher specimen<br>(Herbarium acronym)                                           | Collection<br>locality                 | NCBI<br>accession<br>number |
|-----------------|---------------------------------------------------------------------------|-----------------------------------------------------------------------------------|----------------------------------------|-----------------------------|
| Achatocarpaceae | <i>Achatocarpus gracilis</i><br>H.Walter                                  | Silvia H. Salas<br>Morales et al. 5608<br>(TEX)                                   | Mexico:<br>Oaxaca                      | KY952292                    |
| Achatocarpaceae | <i>Phaulothamnus<br/>spinescens</i> A.Gray                                | Michael J. Moore et<br>al. 976 (OC)                                               | United States:<br>Texas                | KY952477                    |
| Achatocarpaceae | <i>Phaulothamnus<br/>spinescens</i> A.Gray                                | William R. Carr<br>27176 (TEX)                                                    | United States:<br>Texas                | KY952478                    |
| Amaranthaceae   | <i>Allenrolfea occidentalis</i><br>(S.Watson) Kuntze                      | Michael J. Moore 474<br>(OC)                                                      | United States:<br>Texas                | KY952314                    |
| Amaranthaceae   | <i>Alternanthera<br/>caracasana</i> Kunth                                 | Michael J. Moore<br>1808 (OC)                                                     | United States:<br>Texas                | KY952319                    |
| Amaranthaceae   | <i>Amaranthus cruentus</i> L.                                             | Michael J. Moore 356<br>(OC)                                                      | United States:<br>Ohio<br>(cultivated) | KY952320                    |
| Amaranthaceae   | <i>Amaranthus</i> sp.                                                     | Michael J. Moore<br>1801 (OC)                                                     | United States:<br>Texas                | KY952321                    |
| Amaranthaceae   | <i>Amaranthus</i> sp.                                                     | Michael J. Moore<br>2186 (OC)                                                     | United States:<br>Ohio                 | KY952322                    |
| Amaranthaceae   | <i>Amaranthus</i> sp.                                                     | Michael J. Moore<br>2187 (OC)                                                     | United States:<br>Illinois             | KY952323                    |
| Amaranthaceae   | <i>Atriplex prosopidum</i><br>I.M.Johnst.                                 | Hilda Flores Olvera<br>et al. 1658 (MEXU)                                         | Mexico:<br>Coahuila                    | KY952340                    |
| Amaranthaceae   | <i>Atriplex</i> sp.                                                       | Michael J. Moore<br>1689 (OC)                                                     | United States:<br>Texas                | KY952338                    |
| Amaranthaceae   | <i>Atriplex</i> sp.                                                       | Michael J. Moore<br>1699 (OC)                                                     | United States:<br>Texas                | KY952339                    |
| Amaranthaceae   | <i>Celosia argentea</i> L. var.<br><i>plumosa</i>                         | Michael J. Moore 359<br>(OC)                                                      | United States:<br>Ohio<br>(cultivated) | KY952359                    |
| Amaranthaceae   | <i>Charpentiera ovata</i><br>Gaudich. var. <i>ovata</i>                   | Flora K. Samis 7<br>(Lyon Arboretum<br>living collection,<br>accession 2011.0034) | United States:<br>Hawaii               | KY952360                    |
| Amaranthaceae   | <i>Charpentiera tomentosa</i><br>Sohmer var.<br><i>maakuaensis</i> Sohmer | Flora K. Samis 6<br>(Lyon Arboretum<br>living collection,<br>accession 88.0141)   | United States:<br>Hawaii               | KY952361                    |
| Amaranthaceae   | <i>Chenopodium album</i> L.                                               | Michael J. Moore 344<br>(OC)                                                      | United States:<br>Ohio                 | KY952362                    |
| Amaranthaceae   | <i>Gossypianthus<br/>lanuginosus</i> (Poir.) Moq.                         | Michael J. Moore<br>1807 (OC)                                                     | United States:<br>Texas                | KY952408                    |
| Amaranthaceae   | <i>Guilleminea densa</i>                                                  | Michael J. Moore et                                                               | Mexico:                                | KY952412                    |



|                  |                                                                                                   |                                                                           |                            |          |
|------------------|---------------------------------------------------------------------------------------------------|---------------------------------------------------------------------------|----------------------------|----------|
|                  | (Humb. & Bonpl. ex Schult.) Moq.                                                                  | al. 2445 (OC)                                                             | Chihuahua                  |          |
| Amaranthaceae    | <i>Kali tragus</i> (L.) Scop.                                                                     | Michael J. Moore 453 (OC)                                                 | United States: Texas       | KY952506 |
| Amaranthaceae    | <i>Nototrichium divaricatum</i> D.H.Lorence                                                       | Flora K. Samis 3 (Lyon Arboretum living collection, accession 96.0036 #3) | United States: Hawaii      | KY952468 |
| Amaranthaceae    | <i>Nototrichium humile</i> Hillebr.                                                               | Flora K. Samis 2 (Lyon Arboretum living collection, accession 2001-0254)  | United States: Hawaii      | KY952469 |
| Amaranthaceae    | <i>Suaeda jacoensis</i> I.M.Johnst.                                                               | Hilda Flores Olvera et al. 1662 (MEXU)                                    | Mexico: Coahuila           | KY952514 |
| Amaranthaceae    | <i>Suaeda jacoensis</i> I.M.Johnst.                                                               | Michael J. Moore et al. 2617 (OC)                                         | Mexico: Nuevo Leon         | KY952515 |
| Amaranthaceae    | <i>Suaeda mexicana</i> (Standl.) Standl.                                                          | Hilda Flores Olvera et al. 1654 (MEXU)                                    | Mexico: Coahuila           | KY952516 |
| Amaranthaceae    | <i>Tidestromia lanuginosa</i> (Nutt.) Standl.                                                     | Michael J. Moore 1128 (OC)                                                | United States: Texas       | KY952521 |
| Amaranthaceae    | <i>Zuckia brandegeei</i> (A.Gray) S.L.Welsh & Stutz var. <i>plummeri</i> (Stutz & S.C.Sand.) Dorn | Joseph L. M. Charboneau 9672 (RM)                                         | United States: Colorado    | KY952528 |
| Cactaceae        | <i>Leuenbergeria quisqueyana</i> (Alain) Lodé                                                     | Flora K. Samis 11 (Lyon Arboretum living collection, accession 2000.0281) | United States: Hawaii      | KY952473 |
| Caryophyllaceae  | <i>Moehringia macrophylla</i> (Hook.) Fenzl                                                       | Arianna Goodman 1 (OC)                                                    | United States: Oregon      | KY952464 |
| Caryophyllaceae  | <i>Paronychia lundellorum</i> Torr. & A.Gray                                                      | William R. Carr 17607 (MEXU)                                              | United States: Texas       | KY952472 |
| Caryophyllaceae  | <i>Saponaria officinalis</i> L.                                                                   | Michael J. Moore et al. 1819 (OC)                                         | United States: Indiana     | KY952507 |
| Caryophyllaceae  | <i>Schiedea kaalae</i> Wawra                                                                      | Flora K. Samis 5 (Lyon Arboretum living collection, accession 92.0513)    | United States: Hawaii      | KY952509 |
| Caryophyllaceae  | <i>Spergularia salina</i> J.Presl & C.Presl                                                       | Michael J. Moore 1693 (OC)                                                | United States: Texas       | KY952512 |
| Didiereaceae     | <i>Alluaudia ascendens</i> (Drake) Drake                                                          | Michael J. Moore 1645                                                     | United States (cultivated) | KY952318 |
| Dioncophyllaceae | <i>Triphyophyllum peltatum</i> (Hutch. & Dalziel) Airy Shaw                                       | Carel C. H. Jongkind et al. 7136 (WAG)                                    | Liberia                    | KY952524 |
| Droseraceae      | <i>Drosera burmannii</i> Vahl cv. Pilliga Red                                                     | Michael J. Moore 1814 (OC)                                                | United States (cultivated) | KY952400 |
| Droseraceae      | <i>Drosera peltata</i> Thunb.                                                                     | Michael J. Moore                                                          | Australia:                 | KY952401 |

|                 |                                                                     |                                         |                               |          |
|-----------------|---------------------------------------------------------------------|-----------------------------------------|-------------------------------|----------|
|                 |                                                                     | 1817 (OC)                               | Tasmania<br>(cultivated)      |          |
| Droseraceae     | <i>Drosera regia</i> Stephens                                       | Michael J. Moore<br>1812 (OC)           | United States<br>(cultivated) | KY952402 |
| Drosophyllaceae | <i>Drosophyllum<br/>lusitanicum</i> (L.) Link                       | Michael J. Moore<br>1816 (OC)           | United States<br>(cultivated) | KY952403 |
| Frankeniaceae   | <i>Frankenia gypsophila</i><br>I.M.Johnst.                          | Michael J. Moore et<br>al. 1880 (OC)    | Mexico:<br>Nuevo Leon         | KY952406 |
| Microteaceae    | <i>Microtea debilis</i> Sw.                                         | Manuel Rimachi<br>11128 (TEX)           | Peru: Loreto                  | KY952415 |
| Montiaceae      | <i>Claytonia sibirica</i> L.                                        | Arianna Goodman 2<br>(OC)               | United States:<br>Oregon      | KY952363 |
| Montiaceae      | <i>Phemeranthus<br/>parviflorus</i> (Nutt.) Kiger                   | Michael J. Moore et<br>al. 2214 (OC)    | United States:<br>New Mexico  | KY952479 |
| Nyctaginaceae   | <i>Abronia angustifolia</i><br>Greene                               | Michael J. Moore et<br>al. 2063 (OC)    | Mexico:<br>Coahuila           | KY952281 |
| Nyctaginaceae   | <i>Abronia angustifolia</i><br>Greene                               | Michael J. Moore et<br>al. 896 (OC)     | United States:<br>New Mexico  | KY952282 |
| Nyctaginaceae   | <i>Abronia bigelovii</i><br>Heimerl                                 | Michael J. Moore et<br>al. 704 (OC)     | United States:<br>New Mexico  | KY952283 |
| Nyctaginaceae   | <i>Abronia elliptica</i><br>A.Nelson                                | Norman A. Douglas<br>2039 (DUKE)        | United States:<br>Arizona     | KY952284 |
| Nyctaginaceae   | <i>Abronia fragrans</i> Nutt.<br>ex Hook.                           | Billie L. Turner 20-<br>22 (SRSC)       | United States:<br>Texas       | KY952285 |
| Nyctaginaceae   | <i>Abronia fragrans</i> Nutt.<br>ex Hook.                           | Glenn Kroh et al.<br>3021 (TEX)         | United States:<br>Texas       | KY952286 |
| Nyctaginaceae   | <i>Abronia macrocarpa</i><br>L.A.Galloway                           | Steve L. Orzell et al.<br>6492 (TEX)    | United States:<br>Texas       | KY952287 |
| Nyctaginaceae   | <i>Abronia mellifera</i><br>Douglas ex Hook.                        | N. Elizabeth<br>Saunders BP 19<br>(SIU) | United States:<br>Wyoming     | KY952288 |
| Nyctaginaceae   | <i>Abronia mellifera</i><br>Douglas ex Hook.                        | N. Elizabeth<br>Saunders BP 20<br>(SIU) | United States:<br>Wyoming     | KY952289 |
| Nyctaginaceae   | <i>Abronia nana</i> S.Watson<br>var. <i>nana</i>                    | Robert C. Sivinski et<br>al. 3108 (NMC) | United States:<br>Arizona     | KY952290 |
| Nyctaginaceae   | <i>Abronia umbellata</i> Lam.                                       | N. Elizabeth<br>Saunders LU 45<br>(SIU) | United States:<br>California  | KY952291 |
| Nyctaginaceae   | <i>Acleisanthes acutifolia</i><br>Standl.                           | James Henrickson et<br>al. 22916 (TEX)  | Mexico:<br>Coahuila           | KY952293 |
| Nyctaginaceae   | <i>Acleisanthes<br/>angustifolia</i> (Torr.)<br>R.A.Levin           | Michael J. Moore 460<br>(OC)            | United States:<br>Texas       | KY952294 |
| Nyctaginaceae   | <i>Acleisanthes</i> cf.<br><i>purpusiana</i> (Heimerl)<br>R.A.Levin | James Henrickson<br>23026 (TEX)         | Mexico:<br>Coahuila           | KY952309 |
| Nyctaginaceae   | <i>Acleisanthes<br/>chenopodioides</i><br>(A.Gray) R.A.Levin        | Michael J. Moore et<br>al. 733 (OC)     | United States:<br>Texas       | KY952295 |

|               |                                                                                                                                       |                                    |                              |          |
|---------------|---------------------------------------------------------------------------------------------------------------------------------------|------------------------------------|------------------------------|----------|
| Nyctaginaceae | <i>Acleisanthes crassifolia</i><br>A.Gray                                                                                             | Michael J. Moore et al. 569 (OC)   | United States:<br>Texas      | KY952296 |
| Nyctaginaceae | <i>Acleisanthes diffusa</i><br>(A.Gray) R.A.Levin var.<br><i>diffusa</i>                                                              | Michael J. Moore et al. 624 (OC)   | United States:<br>Texas      | KY952297 |
| Nyctaginaceae | <i>Acleisanthes lanceolata</i><br>(Wooton) R.A.Levin<br>var. <i>lanceolata</i>                                                        | Michael J. Moore et al. 870 (OC)   | United States:<br>New Mexico | KY952298 |
| Nyctaginaceae | <i>Acleisanthes lanceolata</i><br>(Wooton) R.A.Levin<br>var. <i>lanceolata</i>                                                        | Michael J. Moore et al. 903 (OC)   | United States:<br>Texas      | KY952299 |
| Nyctaginaceae | <i>Acleisanthes lanceolata</i><br>(Wooton) R.A.Levin<br>var. <i>megaphylla</i><br>(B.A.Fowler &<br>B.L.Turner) Spellenb. &<br>J.Poole | Alfred T. Richardson<br>1666 (TEX) | Mexico:<br>Chihuahua         | KY952300 |
| Nyctaginaceae | <i>Acleisanthes longiflora</i><br>A.Gray                                                                                              | Michael J. Moore 435<br>(OC)       | United States:<br>Texas      | KY952301 |
| Nyctaginaceae | <i>Acleisanthes longiflora</i><br>A.Gray                                                                                              | Michael J. Moore et al. 571 (OC)   | United States:<br>Texas      | KY952302 |
| Nyctaginaceae | <i>Acleisanthes nana</i><br>I.M.Johnst.                                                                                               | Jackie Smith et al.<br>798 (TEX)   | Mexico: San<br>Luis Potosi   | KY952303 |
| Nyctaginaceae | <i>Acleisanthes obtusa</i><br>(Choisy) Standl.                                                                                        | Michael J. Moore et al. 984 (OC)   | United States:<br>Texas      | KY952304 |
| Nyctaginaceae | <i>Acleisanthes palmeri</i><br>(Hemsley) R.A.Levin                                                                                    | George S. Hinton<br>28620 (TEX)    | Mexico:Nuevo<br>Leon         | KY952305 |
| Nyctaginaceae | <i>Acleisanthes parvifolia</i><br>(Torr.) R.A.Levin                                                                                   | Michael J. Moore 452<br>(OC)       | United States:<br>Texas      | KY952306 |
| Nyctaginaceae | <i>Acleisanthes purpusiana</i><br>(Heimerl) R.A.Levin                                                                                 | James Henrickson<br>22709 (TEX)    | Mexico:<br>Coahuila          | KY952307 |
| Nyctaginaceae | <i>Acleisanthes purpusiana</i><br>(Heimerl) R.A.Levin                                                                                 | Billie L. Turner 6205<br>(TEX)     | Mexico:<br>Coahuila          | KY952308 |
| Nyctaginaceae | <i>Acleisanthes undulata</i><br>(B.A.Fowler &<br>B.L.Turner) R.A.Levin                                                                | James Henrickson<br>23195 (TEX)    | Mexico:<br>Coahuila          | KY952310 |
| Nyctaginaceae | <i>Acleisanthes wrightii</i><br>(A.Gray) Benth. &<br>Hook.                                                                            | Michael J. Moore et al. 620 (OC)   | United States:<br>Texas      | KY952311 |
| Nyctaginaceae | <i>Allionia choisyi</i> Standl.                                                                                                       | Norman A. Douglas<br>2187 (DUKE)   | Mexico:<br>Coahuila          | KY952315 |
| Nyctaginaceae | <i>Allionia incarnata</i> L.                                                                                                          | Michael J. Moore et al. 1352 (OC)  | Mexico:<br>Nuevo Leon        | KY952316 |
| Nyctaginaceae | <i>Allionia</i> sp.                                                                                                                   | Michael J. Moore 424<br>(OC)       | United States:<br>Texas      | KY952317 |
| Nyctaginaceae | <i>Andradea floribunda</i><br>Allemão                                                                                                 | André M. Amorim<br>2294 (NY)       | Brazil                       | KY952324 |
| Nyctaginaceae | <i>Andradea floribunda</i><br>Allemão                                                                                                 | Jacquelyn Ann<br>Kallunki 701 (NY) | Brazil                       | KY952325 |
| Nyctaginaceae | <i>Anulocaulis annulatus</i>                                                                                                          | Richard W.                         | United States:               | KY952326 |

|               |                                                                                                       |                                      |                            |          |
|---------------|-------------------------------------------------------------------------------------------------------|--------------------------------------|----------------------------|----------|
|               | (Coville) Standl.                                                                                     | Spellenberg 3162 (NMC)               | California                 |          |
| Nyctaginaceae | <i>Anulocaulis eriosolenus</i> (A.Gray) Standl.                                                       | James Henrickson et al. 23103 (TEX)  | Mexico: Coahuila           | KY952327 |
| Nyctaginaceae | <i>Anulocaulis eriosolenus</i> (A.Gray) Standl.                                                       | Michael J. Moore et al. 611 (OC)     | United States: Texas       | KY952328 |
| Nyctaginaceae | <i>Anulocaulis hintoniorum</i> B.L.Turner                                                             | Patricia Hernández Ledesma 52 (MEXU) | Mexico: Coahuila           | KY952329 |
| Nyctaginaceae | <i>Anulocaulis leiosolenus</i> (Torr.) Standl. var. <i>gypsogenus</i> (Waterf.) Spellenb. & T.Wootten | Michael J. Moore 402 (OC)            | United States: New Mexico  | KY952330 |
| Nyctaginaceae | <i>Anulocaulis leiosolenus</i> (Torr.) Standl. var. <i>howardii</i> Spellenb. & T.Wootten             | Thomas Wootten et al. s.n. (NMC)     | United States: New Mexico  | KY952331 |
| Nyctaginaceae | <i>Anulocaulis leiosolenus</i> (Torr.) Standl. var. <i>lasianthus</i> I.M.Johnston                    | Michael J. Moore et al. 610 (OC)     | United States: Texas       | KY952332 |
| Nyctaginaceae | <i>Anulocaulis leiosolenus</i> (Torr.) Standl. var. <i>leiosolenus</i>                                | Michael J. Moore 493 (OC)            | United States: Texas       | KY952333 |
| Nyctaginaceae | <i>Anulocaulis leiosolenus</i> (Torr.) Standl. var. <i>leiosolenus</i>                                | Michael J. Moore et al. 825 (OC)     | United States: Nevada      | KY952334 |
| Nyctaginaceae | <i>Anulocaulis leiosolenus</i> (Torr.) Standl. var. <i>leiosolenus</i>                                | Michael J. Moore et al. 853 (OC)     | United States: Arizona     | KY952335 |
| Nyctaginaceae | <i>Anulocaulis reflexus</i> I.M.Johnst.                                                               | Michael J. Moore et al. 242 (TEX)    | Mexico: Chihuahua          | KY952336 |
| Nyctaginaceae | <i>Anulocaulis reflexus</i> I.M.Johnst.                                                               | Michael J. Moore 483 (OC)            | United States: Texas       | KY952337 |
| Nyctaginaceae | <i>Boerhavia anisophylla</i> Torr.                                                                    | Norman A. Douglas 2194 (DUKE)        | Mexico: Durango            | KY952341 |
| Nyctaginaceae | <i>Boerhavia ciliata</i> Brandegee                                                                    | Norman A. Douglas 2145 (DUKE)        | United States: Texas       | KY952342 |
| Nyctaginaceae | <i>Boerhavia coccinea</i> Mill.                                                                       | Michael J. Moore 366 (OC)            | United States: New Mexico  | KY952343 |
| Nyctaginaceae | <i>Boerhavia coulteri</i> (Hook.f.) S.Watson var. <i>palmeri</i> (S.Watson) Spellenb.                 | Richard W. Spellenberg 13273 (NMC)   | United States: Arizona     | KY952344 |
| Nyctaginaceae | <i>Boerhavia dominii</i> Meikle & Hewson                                                              | H. Smyth 42 (NY)                     | Australia: South Australia | KY952345 |
| Nyctaginaceae | <i>Boerhavia gracillima</i> Heimerl                                                                   | Richard W. Spellenberg 12447 (NMC)   | United States: Texas       | KY952347 |
| Nyctaginaceae | <i>Boerhavia intermedia</i> M.E.Jones                                                                 | Richard W. Spellenberg 13279         | United States: Arizona     | KY952348 |

|               |                                                |                                                                  |                                  |          |
|---------------|------------------------------------------------|------------------------------------------------------------------|----------------------------------|----------|
|               |                                                | (NMC)                                                            |                                  |          |
| Nyctaginaceae | <i>Boerhavia lateriflora</i> Standl.           | Norman A. Douglas 2161 (DUKE)                                    | Mexico: Sonora                   | KY952349 |
| Nyctaginaceae | <i>Boerhavia linearifolia</i> A.Gray           | Michael J. Moore et al. 581 (OC)                                 | United States: Texas             | KY952350 |
| Nyctaginaceae | <i>Boerhavia purpurascens</i> A.Gray           | Richard W. Spellenberg 13261 (NMC)                               | United States: Arizona           | KY952351 |
| Nyctaginaceae | <i>Boerhavia repens</i> L.                     | J. S. Rose 2                                                     | United States: Hawaii            | KY952352 |
| Nyctaginaceae | <i>Boerhavia repens</i> L.                     | Richard W. Spellenberg 7183 (NMC)                                | Yemen: Sana                      | KY952353 |
| Nyctaginaceae | <i>Boerhavia</i> sp.                           | Erin Tripp et al. 4090 (OC)                                      | Namibia                          | KY952346 |
| Nyctaginaceae | <i>Boerhavia torreyana</i> (S.Watson) Standl.  | Michael J. Moore et al. 633 (OC)                                 | United States: Texas             | KY952354 |
| Nyctaginaceae | <i>Bougainvillea campanulata</i> Heimerl       | Michael Nee 51257 (TEX)                                          | Bolivia: Santa Cruz              | KY952355 |
| Nyctaginaceae | <i>Bougainvillea glabra</i> Choisy             | Michael J. Moore 538 (OC)                                        | United States: Ohio (cultivated) | KY952356 |
| Nyctaginaceae | <i>Bougainvillea spinosa</i> (Cav.) Heimerl    | J. Saunders et al. 3371 (TEX)                                    | Argentina: San Juan              | KY952357 |
| Nyctaginaceae | <i>Bougainvillea stipitata</i> Griseb.         | Michael Nee 50723 (TEX)                                          | Bolivia: Santa Cruz              | KY952358 |
| Nyctaginaceae | <i>Colignonia glomerata</i> Griseb.            | Michael Nee 52523 (NY)                                           | Bolivia                          | KY952364 |
| Nyctaginaceae | <i>Colignonia scandens</i> Benth.              | Martin Grantham 63 (SFBG living collection, accession 1996-0202) | Ecuador                          | KY952365 |
| Nyctaginaceae | <i>Commicarpus ambiguus</i> Meikle             | Mats Thulin 11015 (UPS)                                          | Somalia: Sanaag                  | KY952366 |
| Nyctaginaceae | <i>Commicarpus arabicus</i> Meikle             | Mats Thulin et al. 9294 (UPS)                                    | Yemen: Taizz                     | KY952367 |
| Nyctaginaceae | <i>Commicarpus arabicus</i> Meikle             | Richard W. Spellenberg 7217 (NMC)                                | Yemen: Ibb                       | KY952368 |
| Nyctaginaceae | <i>Commicarpus arabicus</i> Meikle             | Richard W. Spellenberg 7297 (NMC)                                | Yemen: Ibb                       | KY952369 |
| Nyctaginaceae | <i>Commicarpus australis</i> (Meikle) Govaerts | Richard W. Spellenberg et al. 9469 (NMC)                         | Australia: Western Australia     | KY952370 |
| Nyctaginaceae | <i>Commicarpus boissieri</i> (Heimerl) Cufod.  | Mats Thulin 11423 (UPS)                                          | Oman: Dhofar                     | KY952371 |
| Nyctaginaceae | <i>Commicarpus boissieri</i> (Heimerl) Cufod.  | Carl J. Rothfels et al. 4331                                     | Oman: Ash Sharqiyah              | KY952373 |
| Nyctaginaceae | <i>Commicarpus</i>                             | Patricia Hernández                                               | Mexico: Baja                     | KY952372 |

|               |                                                           |                                                 |                                |          |
|---------------|-----------------------------------------------------------|-------------------------------------------------|--------------------------------|----------|
|               | <i>brandegeei</i> Standl.                                 | Ledesma 55 (MEXU)                               | California Sur                 |          |
| Nyctaginaceae | <i>Commicarpus coctoris</i><br>N.A.Harriman               | Richard W.<br>Spellenberg et al.<br>12883 (NMC) | Mexico:<br>Oaxaca              | KY952374 |
| Nyctaginaceae | <i>Commicarpus commersonii</i> (Baill.)<br>Cavaco         | Mats Thulin et al.<br>11836 (UPS)               | Madagascar:<br>Toliara         | KY952380 |
| Nyctaginaceae | <i>Commicarpus decipiens</i><br>Meikle                    | Erin Tripp et al. 4127<br>(NMC)                 | Namibia                        | KY952375 |
| Nyctaginaceae | <i>Commicarpus grandiflorus</i> (A.Rich.)<br>Standl.      | Mats Thulin et al.<br>9311 (UPS)                | Yemen: Taizz                   | KY952376 |
| Nyctaginaceae | <i>Commicarpus greenwayi</i><br>Meikle                    | Mats Thulin 606<br>(UPS)                        | Tanzania:<br>Iringa            | KY952377 |
| Nyctaginaceae | <i>Commicarpus helenae</i><br>(Roem. & Schult.)<br>Meikle | Richard W.<br>Spellenberg et al.<br>7504 (NMC)  | Yemen:<br>Dhamar               | KY952378 |
| Nyctaginaceae | <i>Commicarpus hiranensis</i><br>Thulin                   | Mats Thulin et al.<br>11225 (UPS)               | Ethiopia:<br>Harerge           | KY952379 |
| Nyctaginaceae | <i>Commicarpus mistus</i><br>Thulin                       | Mats Thulin et al.<br>9786 (UPS)                | Yemen:<br>Mahrah               | KY952381 |
| Nyctaginaceae | <i>Commicarpus parviflorus</i> Thulin                     | Mats Thulin 6318<br>(UPS)                       | Somalia:<br>Banaadir           | KY952382 |
| Nyctaginaceae | <i>Commicarpus pedunculatus</i> (A.Rich.)<br>Cufod.       | Mats Thulin 1301<br>(UPS)                       | Ethiopia:<br>Arussi            | KY952383 |
| Nyctaginaceae | <i>Commicarpus plumbagineus</i> (Cav.)<br>Standl.         | Mats Thulin 10747<br>(UPS)                      | Somalia:<br>Togdheer           | KY952384 |
| Nyctaginaceae | <i>Commicarpus plumbagineus</i> (Cav.)<br>Standl.         | Mats Thulin et al.<br>11330 (UPS)               | Ethiopia:<br>Harerge           | KY952385 |
| Nyctaginaceae | <i>Commicarpus plumbagineus</i> (Cav.)<br>Standl.         | Richard W.<br>Spellenberg et al.<br>7374 (NMC)  | Yemen: Ta'izz                  | KY952386 |
| Nyctaginaceae | <i>Commicarpus praetermissus</i><br>N.A.Harriman          | Richard W.<br>Spellenberg et al.<br>12905 (NMC) | Mexico:<br>Michoacán           | KY952387 |
| Nyctaginaceae | <i>Commicarpus reniformis</i><br>(Chiov.) Cufod.          | Mats Thulin 4200<br>(UPS)                       | Somalia: Sool                  | KY952388 |
| Nyctaginaceae | <i>Commicarpus reniformis</i><br>(Chiov.) Cufod.          | Mats Thulin et al.<br>8337 (UPS)                | Yemen:<br>Hadramaut            | KY952389 |
| Nyctaginaceae | <i>Commicarpus scandens</i><br>(L.) Standl.               | Michael J. Moore<br>1127 (OC)                   | United States:<br>Texas        | KY952390 |
| Nyctaginaceae | <i>Commicarpus scandens</i><br>(L.) Standl.               | Richard W.<br>Spellenberg et al.<br>12887 (NMC) | Mexico:<br>Puebla              | KY952391 |
| Nyctaginaceae | <i>Commicarpus sinuatus</i><br>Meikle                     | Mats Thulin 10737<br>(UPS)                      | Somalia:<br>Woqooyi<br>Galbeed | KY952392 |

|               |                                                                               |                                                |                              |          |
|---------------|-------------------------------------------------------------------------------|------------------------------------------------|------------------------------|----------|
| Nyctaginaceae | <i>Commicarpus sinuatus</i><br>Meikle                                         | Richard W.<br>Spellenberg 7144<br>(NMC)        | Yemen:<br>Sana'a             | KY952393 |
| Nyctaginaceae | <i>Commicarpus sinuatus</i><br>Meikle                                         | Richard W.<br>Spellenberg 7506<br>(NMC)        | Yemen:<br>Dhamar             | KY952394 |
| Nyctaginaceae | <i>Commicarpus squarrosus</i> (Heimerl)<br>Standl. var. <i>squarrosus</i>     | Erin Tripp et al. 4049<br>(NMC)                | Namibia                      | KY952395 |
| Nyctaginaceae | <i>Commicarpus stenocarpus</i> (Chiov.)<br>Cufod.                             | Mats Thulin et al.<br>8062 (UPS)               | Yemen:<br>Hadramaut          | KY952396 |
| Nyctaginaceae | <i>Cuscatlania vulcanicola</i><br>Standl.                                     | José L. Linares 12938<br>(MEXU)                | El Salvador:<br>Sonsonate    | KY952397 |
| Nyctaginaceae | <i>Cuscatlania vulcanicola</i><br>Standl.                                     | José L. Linares 13440<br>(MEXU)                | El Salvador:<br>Sonsonate    | KY952398 |
| Nyctaginaceae | <i>Cyphomeris gypsophiloides</i><br>(M.Martens & Galeotti)<br>Standl.         | Michael J. Moore et<br>al. 582 (OC)            | United States:<br>Texas      | KY952399 |
| Nyctaginaceae | <i>Grajalesia fasciculata</i><br>(Standl.) Miranda                            | José L. Linares 13416<br>(MEXU)                | El Salvador:<br>Sonsonate    | KY952409 |
| Nyctaginaceae | <i>Guapira discolor</i><br>(Spreng.) Little                                   | Richard W.<br>Spellenberg 13294<br>(NMC)       | United States:<br>Florida    | KY952410 |
| Nyctaginaceae | <i>Guapira eggersiana</i><br>(Heimerl) Lundell                                | Scott A. Mori<br>25542/40 (NY)                 | French Guiana                | KY952411 |
| Nyctaginaceae | <i>Mirabilis albida</i><br>(Walter) Heimerl                                   | Norman A. Douglas<br>2035 (DUKE)               | United States:<br>Arizona    | KY952416 |
| Nyctaginaceae | <i>Mirabilis albida</i><br>(Walter) Heimerl                                   | William R. Carr<br>11075 (TEX)                 | United States:<br>Texas      | KY952417 |
| Nyctaginaceae | <i>Mirabilis alipes</i><br>(S.Watson) Pilz                                    | Arnold Tiehm 13461<br>(TEX)                    | United States:<br>Nevada     | KY952418 |
| Nyctaginaceae | <i>Mirabilis bigelovii</i><br>A.Gray var. <i>retrorsa</i> (A.<br>Heller) Munz | James D. Morefield<br>et al. 3780 (TEX)        | United States:<br>California | KY952419 |
| Nyctaginaceae | <i>Mirabilis</i> cf. <i>glabrifolia</i><br>(Ortega) I.M.Johnst.               | Michael J. Moore et<br>al. 1244 (OC)           | Mexico: San<br>Luis Potosi   | KY952428 |
| Nyctaginaceae | <i>Mirabilis</i> cf. <i>nesomii</i><br>B.L.Turner                             | George S. Hinton<br>25567 (TEX)                | Mexico:<br>Nuevo Leon        | KY952449 |
| Nyctaginaceae | <i>Mirabilis coccinea</i><br>(Torr.) Benth. & Hook.f.                         | Norman A. Douglas<br>2133 (DUKE)               | United States:<br>Arizona    | KY952420 |
| Nyctaginaceae | <i>Mirabilis coccinea</i><br>(Torr.) Benth. & Hook.f.                         | Steven P.<br>McLaughlin et al.<br>9354 (ARIZ)  | United States:<br>Arizona    | KY952421 |
| Nyctaginaceae | <i>Mirabilis comata</i><br>(Small) Standl.                                    | Norman A. Douglas<br>2084 (DUKE)               | United States:<br>Arizona    | KY952422 |
| Nyctaginaceae | <i>Mirabilis decumbens</i><br>(Nutt.) Daniels                                 | Richard W.<br>Spellenberg et al.<br>4073 (TEX) | Mexico:<br>Zacatecas         | KY952423 |

|               |                                                                                                                 |                                             |                               |          |
|---------------|-----------------------------------------------------------------------------------------------------------------|---------------------------------------------|-------------------------------|----------|
| Nyctaginaceae | <i>Mirabilis donahooiana</i><br>Le Duc                                                                          | Alice Le Duc et al.<br>247 (TEX)            | Mexico:<br>Michoacán          | KY952424 |
| Nyctaginaceae | <i>Mirabilis exserta</i><br>Brandegee                                                                           | Pedro Tenorio 10586<br>(MEXU)               | Mexico                        | KY952425 |
| Nyctaginaceae | <i>Mirabilis gigantea</i><br>(Standl.) Shinnery                                                                 | J. Quayle et al. 752<br>(TEX)               | United States:<br>Texas       | KY952426 |
| Nyctaginaceae | <i>Mirabilis glabra</i><br>(S. Watson) Standl.                                                                  | Michael J. Moore et<br>al. 674 (OC)         | United States:<br>New Mexico  | KY952446 |
| Nyctaginaceae | <i>Mirabilis glabrifolia</i><br>(Ortega) I.M. Johnst.                                                           | Guy Nesom et al.<br>7654 (TEX)              | Mexico:<br>Coahuila           | KY952427 |
| Nyctaginaceae | <i>Mirabilis glabrifolia</i><br>(Ortega) I.M. Johnst.                                                           | Michael J. Moore et<br>al. 1325 (OC)        | Mexico:<br>Nuevo Leon         | KY952429 |
| Nyctaginaceae | <i>Mirabilis gracilis</i><br>(Standl.) LeDuc                                                                    | Alice Le Duc et al. 71<br>(TEX)             | Mexico:<br>Jalisco            | KY952430 |
| Nyctaginaceae | <i>Mirabilis grandiflora</i><br>(Standl.) Standl.                                                               | EDL 1863 (MEXU)                             | Mexico                        | KY952431 |
| Nyctaginaceae | <i>Mirabilis greenii</i><br>S. Watson                                                                           | George E. Pilz 998<br>(TEX)                 | United States:<br>California  | KY952432 |
| Nyctaginaceae | <i>Mirabilis himalaica</i><br>(Edgew.) Heimerl var.<br><i>chinensis</i> Heimerl                                 | D. E. Boufford et al.<br>32449 (F)          | China: Xizang<br>(Tibet)      | KY952433 |
| Nyctaginaceae | <i>Mirabilis himalaica</i><br>(Edgew.) Heimerl var.<br><i>chinensis</i> Heimerl                                 | D. E. Boufford et al.<br>41198 (F)          | China: Xizang<br>(Tibet)      | KY952434 |
| Nyctaginaceae | <i>Mirabilis himalaica</i><br>(Edgew.) Heimerl var.<br><i>chinensis</i> Heimerl                                 | D. E. Boufford et al.<br>41435 (F)          | China: Xizang<br>(Tibet)      | KY952435 |
| Nyctaginaceae | <i>Mirabilis hintoniorum</i><br>Le Duc                                                                          | Patricia Hernández<br>Ledesma 118<br>(MEXU) | Mexico:<br>Michoacán          | KY952436 |
| Nyctaginaceae | <i>Mirabilis jalapa</i> L.                                                                                      | Michael J. Moore s.n.                       | United States<br>(cultivated) | KY952437 |
| Nyctaginaceae | <i>Mirabilis laevis</i> (Benth.)<br>Curran                                                                      | Andrew C. Sanders et<br>al. 29410 (TEX)     | United States:<br>California  | KY952438 |
| Nyctaginaceae | <i>Mirabilis latifolia</i><br>(A. Gray) Diggs,<br>Lipscomb & O'Kennon                                           | Victor L. Cory 24549<br>(GH)                | United States:<br>Texas       | KY952439 |
| Nyctaginaceae | <i>Mirabilis linearis</i><br>(Pursh) Heimerl                                                                    | Billie L. Turner 21-<br>854 (TEX)           | United States:<br>Texas       | KY952440 |
| Nyctaginaceae | <i>Mirabilis linearis</i><br>(Pursh) Heimerl var.<br><i>decepiens</i> (Standl.)<br>S.L. Welsh                   | Michael J. Moore et<br>al. 1984 (OC)        | Mexico:<br>Coahuila           | KY952441 |
| Nyctaginaceae | <i>Mirabilis longiflora</i> L.                                                                                  | Michael J. Moore et<br>al. 1230 (OC)        | Mexico: San<br>Luis Potosi    | KY952442 |
| Nyctaginaceae | <i>Mirabilis longiflora</i> L.<br>var. <i>wrightiana</i> (A. Gray<br>ex Britton & Kearney)<br>Kearney & Peebles | Alice Le Duc 185<br>(TEX)                   | United States:<br>New Mexico  | KY952443 |
| Nyctaginaceae | <i>Mirabilis melanotricha</i>                                                                                   | Michael J. Moore et                         | Mexico: San                   | KY952444 |



|               |                                                      |                                                    |                                |          |
|---------------|------------------------------------------------------|----------------------------------------------------|--------------------------------|----------|
|               | (Standl.) Spellenb.                                  | al. 1191 (OC)                                      | Luis Potosi                    |          |
| Nyctaginaceae | <i>Mirabilis melanotricha</i><br>(Standl.) Spellenb. | Norman A. Douglas<br>2067 (DUKE)                   | United States:<br>New Mexico   | KY952445 |
| Nyctaginaceae | <i>Mirabilis multiflora</i><br>(Torr.) A.Gray        | Michael J. Moore<br>1110 (OC)                      | United States:<br>Texas        | KY952447 |
| Nyctaginaceae | <i>Mirabilis multiflora</i><br>(Torr.) A.Gray        | Norman A. Douglas<br>2037 (DUKE)                   | United States:<br>Arizona      | KY952448 |
| Nyctaginaceae | <i>Mirabilis nesomii</i><br>B.L.Turner               | Michael J. Moore et<br>al. 2179 (NMC)              | Mexico:<br>Nuevo Leon          | KY952450 |
| Nyctaginaceae | <i>Mirabilis nesomii</i><br>B.L.Turner               | Michael J. Moore et<br>al. 2643 (NMC)              | Mexico:<br>Nuevo Leon          | KY952451 |
| Nyctaginaceae | <i>Mirabilis nyctaginea</i><br>(Michx.) MacMill.     | William R. Carr<br>14590 (TEX)                     | United States:<br>Texas        | KY952452 |
| Nyctaginaceae | <i>Mirabilis oligantha</i><br>(Standl.) Standl.      | José L. Panero 2816<br>(MEXU)                      | Mexico: Baja<br>California     | KY952453 |
| Nyctaginaceae | <i>Mirabilis oxybaphoides</i><br>(A.Gray) A.Gray     | George S. Hinton<br>25572 (TEX)                    | Mexico:<br>Nuevo Leon          | KY952454 |
| Nyctaginaceae | <i>Mirabilis polonii</i> Le Duc                      | Alice Le Duc 259<br>(MEXU)                         | Mexico:<br>Nuevo Leon          | KY952455 |
| Nyctaginaceae | <i>Mirabilis pringlei</i><br>Weath.                  | Alice Le Duc et al. 63<br>(TEX)                    | Mexico:<br>Jalisco             | KY952456 |
| Nyctaginaceae | <i>Mirabilis pudica</i><br>Barneby                   | Arnold Tiehm 10971<br>(TEX)                        | United States:<br>Nevada       | KY952457 |
| Nyctaginaceae | <i>Mirabilis texensis</i><br>(J.M.Coult.) B.L.Turner | Billie L. Turner 22-<br>417 (TEX)                  | United States:<br>Texas        | KY952458 |
| Nyctaginaceae | <i>Mirabilis triflora</i> Benth.                     | Ramón Cuevas G. et<br>al. 3415 (MEXU)              | Mexico:<br>Jalisco             | KY952459 |
| Nyctaginaceae | <i>Mirabilis urbani</i><br>Heimerl                   | Mark Fishbein et al.<br>5107 (MEXU)                | Mexico:<br>Michoacan           | KY952460 |
| Nyctaginaceae | <i>Mirabilis violacea</i> (L.)<br>Heimerl            | Patricia Hernández<br>Ledesma 63 (MEXU)            | Mexico:<br>Distrito<br>Federal | KY952461 |
| Nyctaginaceae | <i>Mirabilis viscosa</i> Cav.                        | Michael J. Moore et<br>al. 1824 (NMC)              | Mexico: San<br>Luis Potosi     | KY952462 |
| Nyctaginaceae | <i>Mirabilis viscosa</i> Cav.                        | Patricia Hernández<br>Ledesma 13 (MEXU)            | Mexico                         | KY952463 |
| Nyctaginaceae | <i>Neea belizensis</i><br>Donn.Sm.                   | Cyrus L. Lundell<br>17692 (TEX)                    | Guatemala:<br>Petén            | KY952465 |
| Nyctaginaceae | <i>Neea cauliflora</i> Poepp.<br>& Endl.             | Schanke S15106<br>(NY)                             | Peru                           | KY952466 |
| Nyctaginaceae | <i>Neea psychotrioides</i><br>Donn.Sm.               | Robert L. Wilbur<br>63654                          | Costa Rica:<br>Heredia         | KY952467 |
| Nyctaginaceae | <i>Nyctaginia capitata</i><br>Choisy                 | Michael J. Moore et<br>al. 617 (OC)                | United States:<br>Texas        | KY952470 |
| Nyctaginaceae | <i>Okenia hypogaea</i><br>Schltdl. & Cham.           | Thomas R. Van<br>Devender et al. 92-<br>1069 (NMC) | Mexico:<br>Sonora              | KY952471 |
| Nyctaginaceae | <i>Pisonia aculeata</i> L.                           | C. Martínez 1209<br>(TEX)                          | Mexico:<br>Oaxaca              | KY952483 |
| Nyctaginaceae | <i>Pisonia brunoniana</i>                            | J. S. Rose 3                                       | United States:                 | KY952484 |

|                | Endl.                                                                   |                                                                                  | Hawaii                       |          |
|----------------|-------------------------------------------------------------------------|----------------------------------------------------------------------------------|------------------------------|----------|
| Nyctaginaceae  | <i>Pisonia capitata</i><br>(S.Watson) Standl.                           | Ana L. Reina<br>Guerrero et al. 2000-<br>193 (NMC)                               | Mexico:<br>Sonora            | KY952485 |
| Nyctaginaceae  | <i>Pisonia capitata</i><br>(S.Watson) Standl.                           | Thomas R. Van<br>Devender et al. 2003-<br>17 (TEX)                               | United States:<br>Arizona    | KY952486 |
| Nyctaginaceae  | <i>Pisonia macranthocarpa</i><br>(Donn.Sm.) Donn.Sm.                    | Dennis E. Breedlove<br>et al. 30361 (TEX)                                        | Mexico:<br>Chiapas           | KY952487 |
| Nyctaginaceae  | <i>Pisonia sandwicensis</i><br>Hillebr.                                 | Flora K. Samis 1<br>(Lyon Arboretum<br>living collection)                        | United States:<br>Hawaii     | KY952488 |
| Nyctaginaceae  | <i>Pisonia sylvatica</i> Standl.                                        | José L. Linares 13403<br>(MEXU)                                                  | El Salvador:<br>Sonsonate    | KY952489 |
| Nyctaginaceae  | <i>Pisonia umbellifera</i><br>(J.R.Forst. & G.Forst.)<br>Seem.          | Flora K. Samis 12<br>(Lyon Arboretum<br>living collection,<br>accession 68.0453) | United States:<br>Hawaii     | KY952490 |
| Nyctaginaceae  | <i>Pisonia zapallo</i> Griseb.                                          | Israel G. Vargas et al.<br>2001 (TEX)                                            | Bolivia: Santa<br>Cruz       | KY952491 |
| Nyctaginaceae  | <i>Pisoniella arborescens</i><br>(Lag. & Rodr.) Standl.                 | Alice Le Duc et al.<br>231 (NMC)                                                 | Mexico:<br>Oaxaca            | KY952492 |
| Nyctaginaceae  | <i>Pisoniella arborescens</i><br>(Lag. & Rodr.) Standl.                 | William R. Anderson<br>13522 (NY)                                                | Mexico:<br>Oaxaca            | KY952493 |
| Nyctaginaceae  | <i>Ramisia brasiliensis</i><br>Oliv.                                    | Jomar G. Jardim<br>1507 (NY)                                                     | Brazil                       | KY952495 |
| Nyctaginaceae  | <i>Reichenbachia hirsuta</i><br>Spreng.                                 | Michael Nee 47813<br>(NY)                                                        | Bolivia                      | KY952496 |
| Nyctaginaceae  | <i>Reichenbachia<br/>paraguayensis</i><br>(D.Parodi) Dugand &<br>Daniel | Maria Maguidaura<br>Hatschbach 49218<br>(NY)                                     | Brazil                       | KY952497 |
| Nyctaginaceae  | <i>Salpianthus arenarius</i><br>Bonpl.                                  | Richard W.<br>Spellenberg 12903<br>(NMC)                                         | Mexico:<br>Michoacán         | KY952503 |
| Nyctaginaceae  | <i>Salpianthus<br/>macrodonatus</i> Standl.                             | Thomas R. Van<br>Devender et al. 91-<br>894 (NMC)                                | Mexico:<br>Sonora            | KY952504 |
| Nyctaginaceae  | <i>Salpianthus<br/>purpurascens</i> (Cav. ex<br>Lag.) Hook. & Arn.      | Richard W.<br>Spellenberg et al.<br>12885 (NMC)                                  | Mexico:<br>Oaxaca            | KY952505 |
| Nyctaginaceae  | <i>Tripterocalyx carneus</i><br>(Greene) L.A.Galloway                   | Norman A. Douglas<br>2060 (DUKE)                                                 | United States:<br>New Mexico | KY952525 |
| Nyctaginaceae  | <i>Tripterocalyx crux-<br/>maltae</i> (Kellogg) Standl.                 | Arnold Tiehm et al.<br>12213 (TEX)                                               | United States:<br>Nevada     | KY952526 |
| Nyctaginaceae  | <i>Tripterocalyx<br/>micranthus</i> (Torr.)<br>Hook.                    | B. MacLeod et al.<br>751 (TEX)                                                   | United States:<br>Colorado   | KY952527 |
| Phytolaccaceae | <i>Agdestis clematidea</i><br>Moc. & Sessé ex DC.                       | George S. Hinton<br>25023 (TEX)                                                  | Mexico:<br>Tamaulipas        | KY952313 |

|                |                                                            |                                                                          |                              |          |
|----------------|------------------------------------------------------------|--------------------------------------------------------------------------|------------------------------|----------|
| Phytolaccaceae | <i>Gallesia integrifolia</i> (Spreng.) Harms               | Michael Nee et al. 50072 (TEX)                                           | Bolivia: Santa Cruz          | KY952407 |
| Phytolaccaceae | <i>Hillera latifolia</i> (Lam.) H.Walter                   | Michael Nee 33807 (TEX)                                                  | Bolivia: Santa Cruz          | KY952413 |
| Phytolaccaceae | <i>Petiveria alliacea</i> L.                               | Lucas C. Majure 4132 (FLAS)                                              | United States: Florida       | KY952476 |
| Phytolaccaceae | <i>Phytolacca americana</i> L.                             | Michael J. Moore 342 (OC)                                                | United States: Ohio          | KY952480 |
| Phytolaccaceae | <i>Phytolacca icosandra</i> L.                             | Mark H. Mayfield et al. 1001 (TEX)                                       | Mexico: Guerrero             | KY952481 |
| Phytolaccaceae | <i>Phytolacca octandra</i> L.                              | Juan A. Encina et al. 1545 (TEX)                                         | Mexico: Nuevo Leon           | KY952482 |
| Phytolaccaceae | <i>Rivina humilis</i> L.                                   | Michael J. Moore 1129 (OC)                                               | United States: Texas         | KY952499 |
| Phytolaccaceae | <i>Seguieria aculeata</i> Jacq.                            | Elsa Zardini et al. 22101 (TEX)                                          | Paraguay                     | KY952510 |
| Phytolaccaceae | <i>Seguieria paraguariensis</i> Morong                     | Michael Nee 48735 (TEX)                                                  | Bolivia: Santa Cruz          | KY952511 |
| Phytolaccaceae | <i>Trichostigma octandrum</i> (L.) H.Walter                | Michael Nee 47094 (TEX)                                                  | Bolivia: Santa Cruz          | KY952522 |
| Phytolaccaceae | <i>Trichostigma peruvianum</i> (Moq.) H.Walter             | Flora K. Samis 10 (Lyon Arboretum living collection, accession 94.0377)  | United States: Hawaii        | KY952523 |
| Plumbaginaceae | <i>Aegialitis annulata</i> R.Br.                           | Christopher T. Martine 4043 (OC)                                         | Australia: Western Australia | KY952312 |
| Plumbaginaceae | <i>Limonium limbatum</i> Small                             | Michael J. Moore et al. 694 (OC)                                         | United States: New Mexico    | KY952414 |
| Plumbaginaceae | <i>Plumbago scandens</i> L.                                | Michael J. Moore et al. 1828 (OC)                                        | Mexico: San Luis Potosi      | KY952494 |
| Polygonaceae   | <i>Eriogonum longifolium</i> Nutt. var. <i>longifolium</i> | Michael J. Moore 1796 (OC)                                               | United States: Texas         | KY952404 |
| Polygonaceae   | <i>Eriogonum rotundifolium</i> Benth.                      | Michael J. Moore 1769 (OC)                                               | United States: New Mexico    | KY952405 |
| Polygonaceae   | <i>Persicaria odorata</i> LaLlave                          | Flora K. Samis 9 (Lyon Arboretum living collection, accession 88.0439)   | United States: Hawaii        | KY952475 |
| Polygonaceae   | <i>Persicaria</i> sp.                                      | Michael J. Moore 1177                                                    | United States: Ohio          | KY952474 |
| Polygonaceae   | <i>Reynoutria japonica</i> (Houtt.) Ronse Decr.            | Michael J. Moore 2188 (OC)                                               | United States: Ohio          | KY952498 |
| Polygonaceae   | <i>Rumex albescens</i> Hillebr.                            | Flora K. Samis 4 (Lyon Arboretum living collection, accession 2008-0119) | United States: Hawaii        | KY952500 |
| Polygonaceae   | <i>Rumex</i> sp.                                           | Michael J. Moore 1800 (OC)                                               | United States: Texas         | KY952501 |
| Polygonaceae   | <i>Rumex</i> sp.                                           | Michael J. Moore                                                         | United States:               | KY952502 |

|                    |                                               |                                                                          |                            |          |
|--------------------|-----------------------------------------------|--------------------------------------------------------------------------|----------------------------|----------|
|                    |                                               | 1805 (OC)                                                                | Texas                      |          |
| Sarcobataceae      | <i>Sarcobatus vermiculatus</i> (Hook.) Torr.  | Michael J. Moore et al. 813 (OC)                                         | United States: Utah        | KY952508 |
| Stegnospermataceae | <i>Stegnosperma cubense</i> A.Rich.           | Silvia H. Salas Morales 2649 (NY)                                        | Mexico: Oaxaca             | KY952513 |
| Talinaceae         | <i>Talinum</i> cf. <i>aurantiacum</i> Engelm. | Michael J. Moore et al. 1985 (OC)                                        | Mexico: Coahuila           | KY952517 |
| Talinaceae         | <i>Talinum fruticosum</i> (L.) Juss.          | Flora K. Samis 8 (Lyon Arboretum living collection, accession 2012.0008) | United States: Hawaii      | KY952518 |
| Talinaceae         | <i>Talinum paniculatum</i> (Jacq.) Gaertn.    | Michael J. Moore 1789 (OC)                                               | United States (cultivated) | KY952520 |
| Talinaceae         | <i>Talinum</i> sp.                            | Michael J. Moore et al. 1974 (MEXU)                                      | Mexico: Coahuila           | KY952519 |

692

693 **Table 2** List of primers used to amplify the *matK* sequences newly reported here. Within each  
 694 primer name, the number indicates the approximate position of the primer in nucleotides  
 695 downstream from the start of *matK*.

696

| Primer name    | Sequence (5'→3')                | Notes                                                                                                 |
|----------------|---------------------------------|-------------------------------------------------------------------------------------------------------|
| matK.300F.Car  | TTG CAG TCA TTG TGG AAA TTC C   | works broadly across most of Caryophyllales, but generally fails in Caryophyllaceae and Frankeniaceae |
| matK.1350R.Car | GCC AAA GTT CTA GCA CAA GAA AG  | works broadly across most of Caryophyllales                                                           |
| matK.210F.Car  | TTC GGC TAA TGA TTC TCA CCA A   | designed specifically for Caryophyllaceae                                                             |
| matK.1345R.Car | GAG CCA AAG TTC TAG CAC AAG AA  | designed specifically for Caryophyllaceae                                                             |
| matK.1355R.Car | TGT GTT TAC GAG CTA AAG TTC TAG | designed specifically for Caryophyllaceae                                                             |
| matK.300F.Fra  | TCG CTG TCT TTG CTG AAA TTC C   | designed specifically for Frankeniaceae                                                               |

697

698 **Table 3** Summary of WGD events at identified clades with distance to diversification shift and  
 699 climate occupancy information. Numbers correspond to those in Figs. 1 and 2.

| # | Putative WGD                               | Distance to diversification shift in nodes ML(BS) | Subtending species (sister) | Mean annual temp °C (sister) | Mean annual precip mm (sister) |
|---|--------------------------------------------|---------------------------------------------------|-----------------------------|------------------------------|--------------------------------|
| 1 | Tribe Nyctagineae within the Nyctaginaceae | 0 (0)                                             | 123 (40)                    | 17.49 (20.08)                | 482.9 (997.08)                 |
| 2 | Phytolaccoid clade                         | 6 (6)                                             | 182 (407)                   | 19.64 (18.36)                | 1007.58 (452.47)               |

|    |                                                                                                   |         |           |               |                      |
|----|---------------------------------------------------------------------------------------------------|---------|-----------|---------------|----------------------|
| 3  | <i>Claytonia</i>                                                                                  | NA      | 38 (15)   | 5.28 (7.25)   | 790.5 (970.36)       |
| 4  | Portulacineae                                                                                     | 1 (1)   | 1600 (38) | 16.19 (19.35) | 699.87 (736.42)      |
| 5  | <i>Amaranthus</i>                                                                                 | 0 (0)   | 28 (1)    | 16.27 (27.09) | 797.74 (117.63)      |
| 6  | Tribe<br>Gomphrenoideae<br>within<br>Amaranthaceae                                                | 7 (7)   | 172 (41)  | 17.91 (16.65) | 871.95 (1289.5)      |
| 7  | in Caryophyllaceae<br>(Alsinoideae +<br>Caryophylloideae<br>sensu Greenberg and<br>Donoghue 2011) | 9 (9)   | 793 (13)  | 11.44 (12.06) | 761.43 (720.00)      |
| 8  | Polygonaceae                                                                                      | 13 (13) | 670 (70)  | 16.3. (16.89) | 1084.17<br>(794.28)  |
| 9  | Plumbaginaceae                                                                                    | NA      | 70 (670)  | 16.89 (16.3)  | 794.28<br>(1084.17)  |
| 10 | Droseraceae                                                                                       | 8 (NA)  | 67 (108)  | 16.3 (19.08)  | 1280.57<br>(1491.72) |
| 11 | Nepenthaceae                                                                                      | 4 (NA)  | 89 (19)   | 22.52 (20.05) | 2170.5<br>(1611.63)  |
| 12 | Ancistrocladaceae                                                                                 | 0 (NA)  | 15 (3)    | 24.17 (25.6)  | 1899.13<br>(2882.4)  |
| 13 | Tamaricaceae                                                                                      | NA      | 19 (3)    | 14.09 (16.21) | 568.32 (469.61)      |

700

701

702 **Table 4** Summary of diversification shifts. Letters correspond to those in Figs. 1 and 2.

| #  | Family                       | Diversification shift                                                    | Mean shift (ML) | Mean shift (BS) |
|----|------------------------------|--------------------------------------------------------------------------|-----------------|-----------------|
| a  | Cactaceae                    | <i>Echinops</i>                                                          | 1.7957          | 2.2008          |
| b  | Cactaceae                    | within <i>Gymnocalycium</i>                                              | 6.9152          |                 |
| c  | Cactaceae                    | <i>Gymnocalycium</i>                                                     | -0.001          | 0.0555          |
| d  | Cactaceae                    | <i>Hylocereus</i> + <i>Selenicereus</i>                                  | 0.1175          |                 |
| e  | Cactaceae                    | <i>Rhipsalis</i> + <i>Schlumbergera</i> + <i>Echinocereus</i> +relatives | 0.0514          |                 |
| f  | Cactaceae                    | <i>Stenocactus</i>                                                       | -0.057          | -0.019          |
| g  | Anacampserotaceae            | <i>Anacampseros</i>                                                      | 0.2624          |                 |
| h  | Portulacaceae                | <i>Portulaca</i>                                                         | 0.0427          | 0.0447          |
| i  | Montiaceae                   | <i>Montiopsis</i>                                                        | 0.9418          |                 |
| j  | Montiaceae                   | Montiaceae                                                               | 0.0325          |                 |
| k  | Aizoaceae                    | <i>Drosanthemum</i> + <i>Delosperma</i> + <i>Hereroa</i> +relatives      | 0.1469          |                 |
| l  | Nyctaginaceae                | <i>Boerhavia</i>                                                         |                 | 0.0747          |
| m  | Nyctaginaceae                | <i>Commicarpus</i>                                                       | 0.9642          |                 |
| n  | Nyctaginaceae                | Tribe Nyctagineae                                                        | 0.0484          | 0.0485          |
| o  | Nyctaginaceae                | <i>Abronia</i>                                                           |                 | -0.084          |
| p  | Nyctag.+Aizo+Cact.+relatives | Nyctag.+Aizo+Cact.+relatives                                             | 0.0168          | 0.019           |
| r  | Amaranthaceae                | <i>Salicornia</i>                                                        | 0.2732          | 0.1649          |
| s  | Amaranthaceae                | <i>Suaeda</i> clade 1                                                    | 0.1027          |                 |
| t  | Amaranthaceae                | <i>Suaeda</i> clade 2                                                    | -0.036          | -0.028          |
| u  | Amaranthaceae                | <i>Atriplex</i>                                                          | 0.0384          |                 |
| v  | Amaranthaceae                | <i>Corispermum</i>                                                       | 0.1186          |                 |
| w  | Amaranthaceae                | <i>Froelichia</i> + <i>Gomphrena</i> +relatives                          | 0.0217          | 0.0132          |
| x  | Amaranthaceae                | <i>Amaranthus</i>                                                        | 0.335           | 0.2049          |
| y  | Caryophyllaceae              | <i>Dianthus</i>                                                          | 0.0662          | 0.0409          |
| z  | Caryophyllaceae              | <i>Cerastium</i>                                                         | 0.7137          |                 |
| aa | Caryophyllaceae              | <i>Arenaria</i>                                                          | 0.4606          | 0.425           |
| bb | Caryophyllaceae              | <i>Moehringia</i>                                                        | 1.0971          | 0.995           |
| cc | Caryophyllaceae              | <i>Schiedea</i>                                                          | 0.2339          | 0.2767          |
| dd | Polygonaceae                 | <i>Fagopyrum</i>                                                         | -0.04           | -0.034          |
| ee | Polygonaceae                 | <i>Eriogonum</i> +relatives                                              | 0.0432          | 0.0364          |
| ff | Nepenthaceae                 | within <i>Nepenthes</i>                                                  | 0.042           |                 |
| gg | Ancistrocladaceae            | <i>Ancistrocladus</i>                                                    | 0.1426          |                 |
| hh | Droseraceae                  | within <i>Drosera 1</i>                                                  | 0.2237          | 0.2076          |
| ii | Droseraceae                  | within <i>Drosera 2</i>                                                  |                 | 0.1622          |

703

704

705 **Figures**

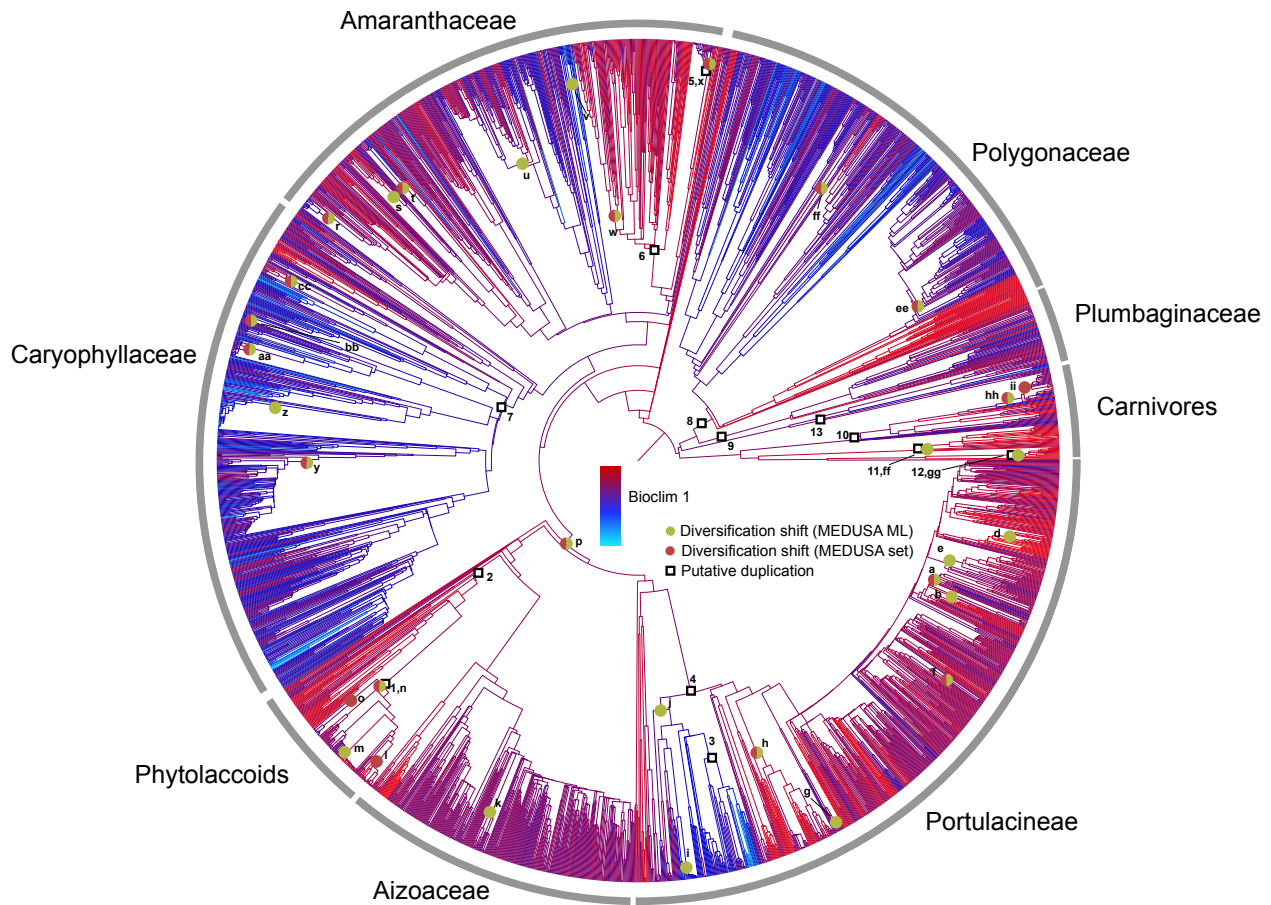

706

707 **Fig. 1** Chronogram of the Caryophyllales with putative WGD mapped along with identified  
708 diversification shifts. Diversification analyses were performed on the maximum likelihood tree  
709 (ML) as well as the bootstrap tree set (set) and those shifts that were identified in both groups are  
710 shown. The branches are colored based on Bioclim variable 1 (Mean Annual Temperature).

711

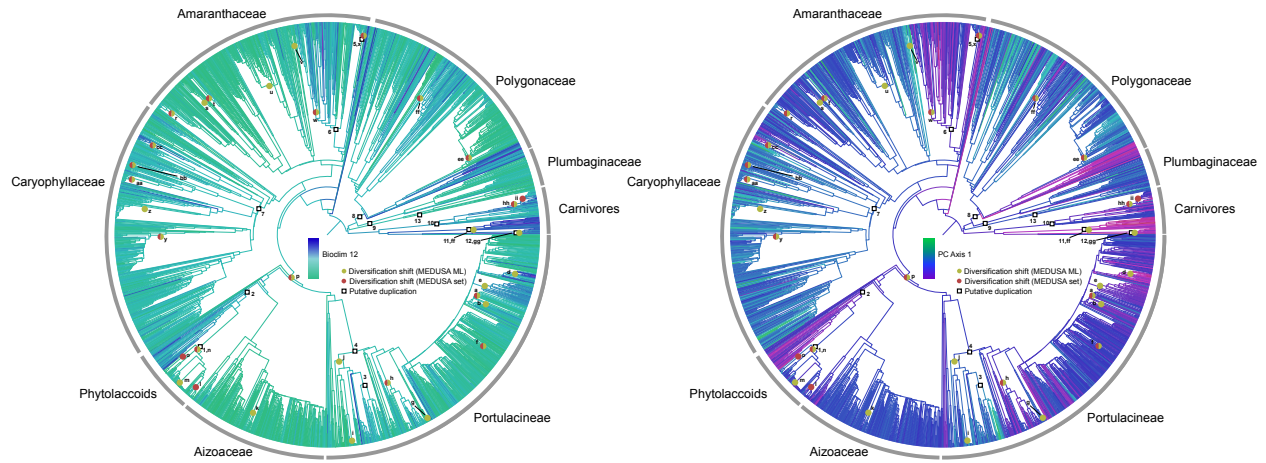

712

713 **Fig. 2** The chronograms and mapping of diversification and WGD are as in Fig. 1 (see caption

714 for details). A) The branches are colored based on Bioclim variable 12 (Mean Annual

715 Precipitation), and B) based on the principal component analyses (PCA) axis 1.

716



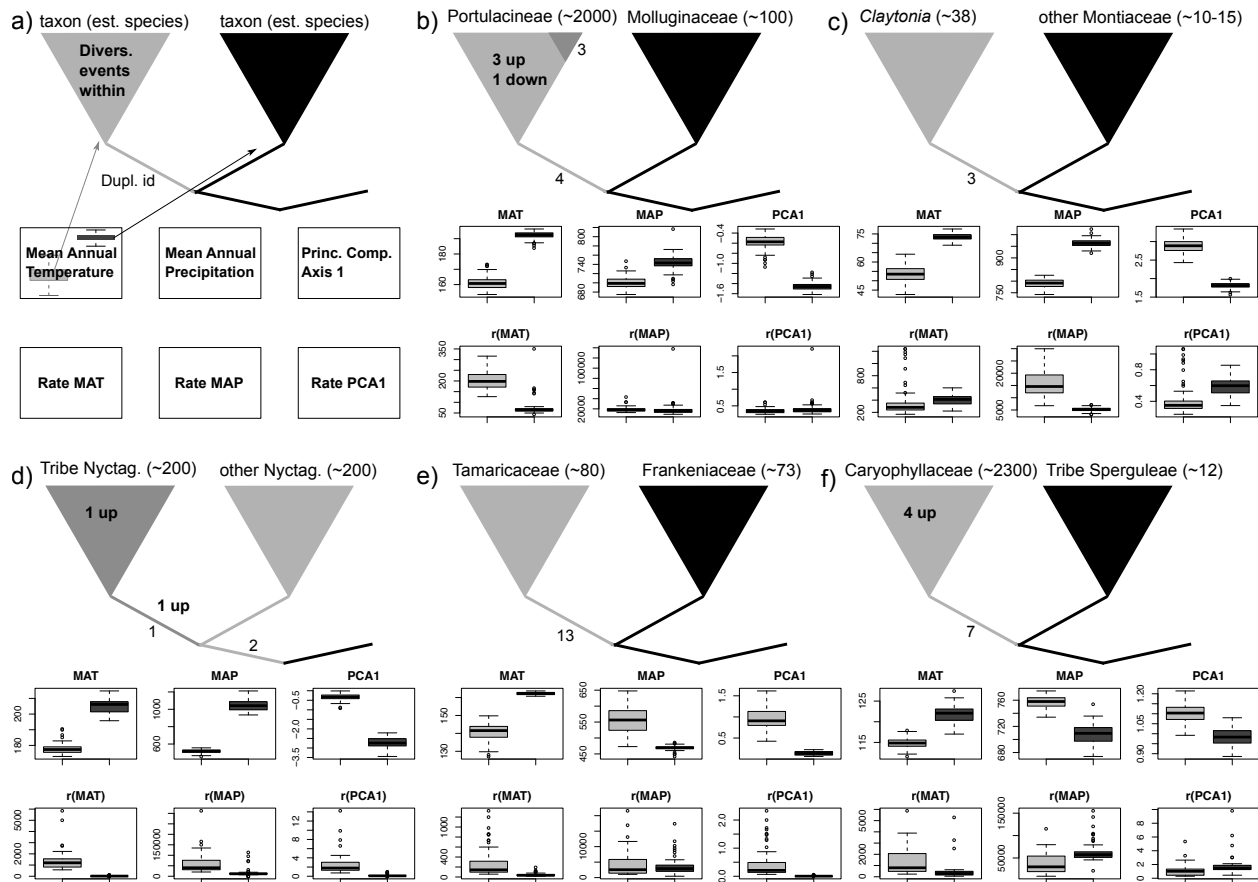

717

718

719

720

721

722

723

724

725

**Fig. 3** Summary of WGD events, with numbers corresponding to those in Table 3, climatic variables, and diversification shifts. Numbers along branches denote WGD, with the numbers corresponding to those in Fig. 1 and Table 3. Numbers inside clades denote the number of diversification rate shifts. Estimated species numbers are listed beside clade names. Box plots show the values estimated (ancestral values are listed in the top rows, rates in the bottom rows) for both the left and right clades across bootstrap samples. Clades shaded grey denote a WGD. b), c), and d) have nested WGD.

## Supporting Information

- 726 **Fig. S1** The cladogram with support mapped for the bootstrap replicates described in the  
727 methods.
- 728 **Fig. S2** The chronograms and mapping of temperature variables (bioclimatic variables 13-19)  
729 that are not presented in Fig. 1.
- 730 **Fig. S3** The chronograms and mapping of precipitation variables (bioclimatic variables 13-19)  
731 that are not presented in Fig. 2.
- 732 **Fig. S4** The chronograms and mapping of PCA axis 2 on the broader Caryophyllales.
- 733 **Fig. S5** Principal component loadings for bioclimatic variables.
